1 T-dependent B cell responses to *Plasmodium* induce antibodies that form  
2 a high-avidity multivalent complex with the circumsporozoite protein

3

4 Short Title: Antibody responses to the *Plasmodium* circumsporozoite protein

5

6 Camilla R. Fisher<sup>1¶</sup>, Henry J. Sutton<sup>2¶</sup>, Joe A. Kaczmarek<sup>1</sup>, Hayley A. McNamara<sup>2</sup>,  
7 Ben Clifton<sup>1</sup>, Joshua Mitchell<sup>1</sup>, Yeping Cai<sup>2</sup>, Johanna N. Dups<sup>2</sup>, Nicholas J. D'Arcy<sup>2</sup>,  
8 Mandeep Singh<sup>2</sup>, Aaron Chuah<sup>2</sup>, Thomas S. Peat<sup>3</sup>, Colin J. Jackson<sup>1\*</sup> and Ian A.  
9 Cockburn<sup>2\*</sup>

10

11 1. Research School of Chemistry, The Australian National University, Canberra, ACT  
12 2601, Australia

13

14 2. John Curtin School of Medical Research, The Australian National University,  
15 Canberra, ACT 2601, Australia

16

17 3. CSIRO Biomedical Manufacturing Program, Parkville, VIC 3052, Australia

18

19 \* Corresponding authors

20 E-mail: [colin.jackson@anu.edu.au](mailto:colin.jackson@anu.edu.au)

21 E-mail: [ian.cockburn@anu.edu.au](mailto:ian.cockburn@anu.edu.au) (lead contact).

22

23 <sup>¶</sup> These authors contributed equally to this work

24

25

26 **Abstract**

27

28 The repeat region of the *Plasmodium falciparum* circumsporozoite protein (CSP) is a  
29 major vaccine antigen because it can be targeted by parasite neutralizing antibodies;

30 however, little is known about this interaction. We used isothermal titration

31 calorimetry, X-ray crystallography and mutagenesis-validated modeling to analyze

32 the binding of a murine neutralizing antibody to *Plasmodium falciparum* CSP.

33 Strikingly, we found that the repeat region of CSP is bound by multiple antibodies.

34 This repeating pattern allows multiple weak interactions of single F<sub>AB</sub> domains to

35 accumulate and yield a complex with a dissociation constant in the low nM range.

36 Because the CSP protein can potentially cross-link multiple B cell receptors (BCRs)

37 we hypothesized that the B cell response might be T cell independent. However,

38 while there was a modest response in mice deficient in T cell help, the bulk of the

39 response was T cell dependent. By sequencing the BCRs of CSP-repeat specific B

40 cells in inbred mice we found that these cells underwent somatic hypermutation and

41 affinity maturation indicative of a T-dependent response. Last, we found that the BCR

42 repertoire of responding B cells was limited suggesting that the structural simplicity

43 of the repeat may limit the breadth of the immune response.

44

45

46 **Author Summary**

47

48 Vaccines aim to protect by inducing the immune system to make molecules called  
49 antibodies that can recognize molecules on the surface of invading pathogens. In the  
50 case of malaria, our most advanced vaccine candidates aim to promote the production  
51 of antibodies that recognize the circumsporozoite protein (CSP) molecule on the  
52 surface of the invasive parasite stage called the sporozoite. In this report we use X-ray  
53 crystallography to determine the structure of CSP-binding antibodies at the atomic  
54 level. We use other techniques such as isothermal titration calorimetry and structural  
55 modeling to examine how this antibody interacts with the CSP molecule. Strikingly,  
56 we found that each CSP molecule could bind 6 antibodies. This finding has  
57 implications for the immune response and may explain why high titers of antibody are  
58 needed for protection. Moreover, because the structure of the CSP repeat is quite  
59 simple we determined that the number of different kinds of antibodies that could bind  
60 this molecule are quite small. However a high avidity interaction between those  
61 antibodies and CSP can result from a process called affinity maturation that allows the  
62 body to learn how to make improved antibodies specific for pathogen molecules.  
63 These data show that while it is challenging for the immune system to recognize and  
64 neutralize CSP, it should be possible to generate viable vaccines targeting this  
65 molecule.

66

## 67 **Introduction**

68

69 Malaria caused by *Plasmodium falciparum* causes the deaths of around  
70 430,000 people each year [1]. The most advanced vaccine candidate for malaria is the  
71 RTS,S/AS01 vaccine which consists of a truncated version of the sporozoite-surface  
72 circumsporozoite protein (CSP), packaged in a Hepatitis C core virus-like particle  
73 delivered in AS01 - a proprietary liposome based adjuvant [2]. Phase II and Phase III  
74 clinical trials have repeatedly demonstrated that the vaccine gives around 50%  
75 protection against clinical malaria in field settings for the first year following  
76 vaccination [3]. The bulk of protection is attributed to antibodies targeting the CSP  
77 repeat epitope included within the vaccine, with some contribution from CD4+ T cells  
78 [4]. It is still unclear why the antibody response to CSP is only partially protective.  
79 We lack structural information about how neutralizing antibodies bind to CSP and  
80 knowledge on the breadth and nature of the B cell response elicited.

81

82 Antibodies to CSP were first identified as potential mediators of protection  
83 following seminal studies that showed that immunization with irradiated sporozoites  
84 could induce sterile protection against live parasite challenge [5,6]. In the early 1980s,  
85 monoclonal antibodies (mAbs) isolated from mice immunized with sporozoites were  
86 found to be capable of blocking invasion of hepatocytes [7] and directly neutralizing  
87 parasites by precipitating the surface protein coat (a process known as the  
88 circumsporozoite reaction) [8]. These antibodies were then used to clone CSP, one of  
89 the first malaria antigens identified [8,9]. The N- and C-terminal domains of CSP  
90 from all *Plasmodium* species are separated by a repeat region, which was the target of  
91 the original mAbs [9-11]. In the 3D7 reference strain of *P. falciparum*, the CSP repeat

92 has 38 asparagine-alanine-asparagine-proline (NANP)-repeats interspersed with 4  
93 asparagine-valine-aspartate-proline (NVDP) repeats that are concentrated towards the  
94 N-terminus [12] though different isolates can contain slightly different numbers of  
95 repeats [13]. One of the most effective *P. falciparum* sporozoite neutralizing  
96 antibodies identified in these early studies was 2A10 which can block sporozoite  
97 infectivity *in vitro* [7] and in *in vivo* mouse models utilizing rodent *P. berghei*  
98 parasites expressing the *P. falciparum* CSP repeat region [14,15].

99

100           While CSP binding antibodies have been shown to be able to neutralize  
101 sporozoites and block infection, it has also been proposed that CSP is an  
102 immunological “decoy” that induces a suboptimal, but broad, T-independent immune  
103 response due to the CSP repeat cross-linking multiple B cell receptors (BCRs) [16].  
104 However, it remains unknown if the repetitive regions of CSP can cross-link multiple  
105 BCRs as they are not as large as typical type-II T-independent antigens [17].  
106 Moreover, the ability to induce a T-independent response does not preclude a T-  
107 dependent component to immunity as well: various oligomeric viral surface proteins  
108 can induce both short-lived T-independent responses and subsequent affinity matured  
109 IgG responses [18,19]. Furthermore, the very little published data on the sequences of  
110 CSP binding antibodies does not convincingly support activation of a broad B cell  
111 repertoire: a small study of five *P. falciparum* CSP mouse monoclonal antibodies  
112 (mAbs) identified some shared sequences [20]. In humans, a study that generated  
113 mAbs from three individuals who received RTS,S found that the three antibodies  
114 studied had distinct sequences though these all used similar heavy chains [21].

115

116           We therefore set out to test the hypothesis that the CSP repeat can bind  
117 multiple antibodies or BCRs and drive a T-independent immune response. To do this  
118 we undertook a comprehensive biophysical characterization of the 2A10 sporozoite-  
119 neutralizing antibody that binds to the CSP repeat. We found that this antibody binds  
120 with an avidity in the nano-molar range which was unexpected as previous studies  
121 using competition ELISAs with peptides predicted a micro-molar affinity [22,23].  
122 Strikingly, isothermal titration calorimetry (ITC), structural analyses, and  
123 mutagenesis-validated modeling revealed that the CSP repeat can be bound by around  
124 six antibodies suggesting that the repeat may potentially crosslink multiple BCRs on  
125 the surface of a B cell. However, analysis of CSP-specific B cells revealed that CSP-  
126 specific B cells can enter Germinal Centers (GCs) and undergo affinity maturation  
127 contradicting the notion that the response to CSP is largely T-independent. Moreover,  
128 we found that the BCR repertoire of CSP-binding B cells is quite limited which may  
129 restrict the size and effectiveness of the immune response.

## 130 **Results**

131

### 132 **Characterization of the thermodynamics of 2A10-antigen binding**

133

134 We began our analysis by performing isothermal titration calorimetry (ITC) to  
135 understand the interaction between 2A10 and CSP. For ease of expression we used a  
136 recombinant CSP (rCSP) construct described previously which was slightly truncated  
137 with 27 repeats [24]. ITC experiments were run on the purified 2A10 antibody and the  
138 purified 2A10 antigen-binding fragment ( $F_{AB}$ ) fragment to test the thermodynamic  
139 basis of the affinity of 2A10  $F_{AB}$  towards CSP. Experiments were also performed on  
140 the 2A10  $F_{AB}$  fragment with the synthetic peptide antigen (NANP)<sub>6</sub>, which is a short  
141 segment of the antigenic NANP-repeat region of CSP (**Table 1; Fig. 1**). The binding  
142 free energies ( $\Delta G$ ) and dissociation constants ( $K_D$ ) were found to be -49.0 kJ/mol and  
143 2.7 nM for the full 2A10 antibody with CSP, -40 kJ/mol and 94 nM for the 2A10  $F_{AB}$   
144 with CSP, and -36.4 kJ/mol and 420 nM for the 2A10  $F_{AB}$  with the (NANP)<sub>6</sub> peptide.

145 Surprisingly, we did not observe a typical 1:1 antibody/ $F_{AB}$  domain:antigen  
146 binding stoichiometry (Table 1). We found that each (NANP)<sub>6</sub> peptide was bound to  
147 by ~2  $F_{AB}$  fragments (2.8 repeats per  $F_{AB}$  domain). With the rCSP protein we  
148 observed that ~11  $F_{AB}$  fragments could bind to each rCSP molecule, (2.5 repeats per  
149  $F_{AB}$  domain. Finally, when the single-domain  $F_{AB}$  fragment is replaced by the full  
150 2A10 antibody (which has two  $F_{AB}$  domains), we observe binding of 5.8 antibodies  
151 per rCSP molecule (4.7 repeats per antibody). Therefore all complexes exhibit  
152 approximately the same binding stoichiometry of two  $F_{AB}$  fragments/domains per ~5  
153 repeat units. These results suggest that the antigenic region of CSP constitutes a  
154 multivalent antigen and that repeating, essentially identical, epitopes must be

155 available for the binding of multiple  $F_{AB}$  domains.

156 **Table 1. Thermodynamic parameters for interactions between 2A10  $F_{AB}$ , 2A10**  
157 **and antigens.**

|                              | <b>(NANP)<sub>6</sub>:F<sub>AB</sub></b> | <b>rCSP:F<sub>AB</sub></b>    | <b>rCSP:2A10</b>            |
|------------------------------|------------------------------------------|-------------------------------|-----------------------------|
| $K_a$ ( $M^{-1}$ )           | $(2.37 \pm 0.91) \times 10^6$            | $(1.07 \pm 0.39) \times 10^7$ | $(3.6 \pm 2.7) \times 10^8$ |
| $K_d$ (nM)                   | $420 \pm 160$                            | $94 \pm 34$                   | $2.7 \pm 2.1$               |
| $\Delta H$ (kJ/mol complex)  | $-113 \pm 5$                             | $-1245 \pm 112$               | $-1175 \pm 44$              |
| $T\Delta S$ (kJ/mol complex) | $-76.6 \pm 4.9$                          | $-1205 \pm 112$               | $-1126 \pm 44$              |
| $\Delta G$ (kJ/mol complex)  | $-36.4 \pm 1.0$                          | $-40.0 \pm 0.9$               | $-49.0 \pm 1.9$             |
| $n$ ( $F_{AB}/2A10: Ag$ )    | $2.16 \pm 0.06$                          | $10.8 \pm 0.7$                | $5.8 \pm 0.1$               |

158 Parameters were determined by ITC at 25 °C. Errors for  $n$  ( $Ag : F_{AB}$ ),  $K_a$  and  
159  $\Delta H$  (complex) are 95% confidence intervals estimated from a single titration; errors  
160 for other parameters were propagated.

161 It is not possible to separate affinity from avidity in this system, although it is  
162 apparent that there is a substantial benefit to the overall strength of binding between  
163 the antibody and antigen through the binding of multiple  $F_{AB}$  domains. The  $F_{AB}$ :rCSP  
164 complex and the 2A10:rCSP complex had similar enthalpy and entropy of binding  
165 (**Table 1**), but the 2A10:rCSP complex had a lower overall  $\Delta G$  binding,  
166 corresponding to a lower dissociation constant (2.7 nM vs. 94 nM for  $F_{AB}$ :rCSP). The  
167 observation that this antibody-antigen (Ab-Ag) interaction is primarily enthalpically  
168 driven is consistent with the general mechanism of Ab-Ag interactions [25]. It is clear  
169 that the dissociation constant ( $K_d$ ) of a single  $F_{AB}$  domain to the (NANP)<sub>6</sub> peptide is  
170 substantially higher (420 nM), and that the avidity, the accumulated strength of the  
171 multiple binding events between the  $F_{AB}$  domains of the antibody and the CSP repeat,  
172 is the basis for the lower  $K_d$  value observed in the 2A10:rCSP complex. Thus, the  
173 characteristic repeating pattern of the epitope on the CSP antigen allows multiple



174 weak interactions with 2A10 F<sub>AB</sub> domains to accumulate, which yields a complex  
175 with a high avidity dissociation constant in the low nM range.

176

### 177 **Structural analysis of the (NANP)-repeat region and the 2A10 F<sub>AB</sub>**

178

179 To better understand the molecular basis of the multivalent interaction  
180 between 2A10 and rCSP, we performed structural analysis of the components.  
181 Previous work indicated that the NANP-repeat region of CSP adopts a flexible rod-  
182 like structure with a regular repeating helical motif that provides significant  
183 separation between the N-terminal and the C-terminal domains [26]. Here, we  
184 performed far-UV circular dichroism (CD) spectroscopy to investigate the structure of  
185 the (NANP)<sub>6</sub> peptide. These results were inconsistent with a disordered random coil  
186 structure (**S1 Fig.**). Rather, the absorption maximum around 185 nm, minimum  
187 around 202 nm and shoulder between 215 and 240 nm, is characteristic of intrinsically  
188 disordered proteins that can adopt a spectrum of states [27].

189

190 The lowest energy structures of the (NANP)<sub>6</sub> repeat were predicted using the  
191 PEP-FOLD *de novo* peptide structure prediction algorithm [28]. The only extended  
192 state among the lowest energy structures that was consistent with the reported spacing  
193 of the N-and C-terminal domains of CSP [26], and which presented multiple  
194 structurally similar epitopes was a linear, quasi-helical structure, which formed a  
195 regularly repeating arrangement of proline turns (**Fig. 2A**). The theoretical CD  
196 spectrum of this conformation was calculated (**S1 Fig.**), qualitatively matching the  
197 experimental spectra: the maximum was at 188 nm, the minimum at 203 nm and there  
198 was a broad shoulder between 215 and 240 nm. To investigate the stability of this

199 conformation, we performed a molecular dynamics (MD) simulation on this peptide,  
200 which showed that this helical structure could unfold, and refold, on timescales of  
201 tens of nanoseconds, supporting the idea that it is a low-energy, frequently sampled,  
202 configuration in solution (**S1 Mov.**, **S2 Fig.**). We also observed the same  
203 characteristic hydrogen bonds between a carbonyl following the proline and the amide  
204 nitrogen of the alanine, and the carbonyl group of an asparagine and a backbone  
205 amide of asparagine three residues earlier, that are observed in the crystal structure of  
206 the NPNA fragment [29]. Thus, this configuration, which is consistent with  
207 previously published experimental data, is a regular, repeating, extended  
208 conformation that would allow binding of multiple  $F_{AB}$  domains to several  
209 structurally similar epitopes.

210

211 To better understand the interaction between the 2A10 and the (NANP)-repeat  
212 region, we solved the crystal structure of the 2A10  $F_{AB}$  fragment in two conditions (**S1**  
213 **Table**), yielding structures that diffracted to 2.5 Å and 3.0 Å. All of the polypeptide  
214 chains were modeled in good quality electron density maps (**Fig. 2B**), except for  
215 residues 134-137 of the light chain. This loop is located at the opposite end of the  $F_{AB}$   
216 fragment to the variable region and not directly relevant to antigen binding. The 2.5 Å  
217 structure contained a single polypeptide in the asymmetric unit, whereas the 3.0 Å  
218 structure contained three essentially identical chains. Superposition of the four unique  
219  $F_{AB}$  fragments from the two structures revealed that the variable antigen binding  
220 region is structurally homogeneous, suggesting that this region might be relatively  
221 pre-organized in the 2A10  $F_{AB}$ . This is consistent with the observation that antibodies  
222 typically undergo relatively limited conformational change upon epitope binding [25].  
223 Indeed, a recent survey of 49 Ab-Ag complexes revealed that within the binding site,

224 the heavy chain Complementarity Determining Region (CDR)-3 was the only element  
225 that showed significant conformational change upon antigen binding and even this  
226 was only observed in one third of the antibodies [30].

227

228         Attempts to obtain a crystal structure of a complex between 2A10 F<sub>AB</sub> and the  
229 (NANP)<sub>6</sub> peptide were unsuccessful; unlike binary Ab-Ag interactions, in which the  
230 Ab will bind to a single epitope on an antigen and produce a population of structurally  
231 homogeneous complexes that can be crystallized, in this interaction we are dealing  
232 with an intrinsically-disordered peptide, the presence of multiple binding sites on the  
233 peptide, and the possibility that more than one 2A10 F<sub>AB</sub> domain can bind the peptide.  
234 Therefore it is difficult to obtain a homogeneous population of complexes, which is a  
235 prerequisite for crystallization. Attempts to soak the (NANP)<sub>6</sub> peptide into the high-  
236 solvent form of 2A10 F<sub>AB</sub>, in which there were no crystal packing interactions with  
237 the binding-loops, caused the crystals to dissolve, again suggesting that the  
238 heterogeneity of the peptide and the presence of multiple epitopes produces disorder  
239 that is incompatible with crystal formation.

240

241 **Modeling the interaction of the 2A10 F<sub>AB</sub> with the NANP-repeat region and**  
242 **testing the model through site-directed mutagenesis**

243

244         Although it was not possible to obtain a crystal structure of the 2A10-  
245 (NANP)<sub>6</sub> peptide complex, the accurate structures of the 2A10 F<sub>AB</sub> fragment, the  
246 (NANP)<sub>6</sub> peptide, and the knowledge that antibodies seldom undergo significant  
247 conformational changes upon antigen binding [30], allowed us to model the  
248 interaction, which we tested using site directed mutagenesis. Computational modeling

249 of Ab-Ag interactions has advanced considerably in recent years and several  
250 examples of complexes with close to atomic accuracy have been reported in the  
251 literature [31]. Using the SnugDock protein-protein docking algorithm [31], we  
252 obtained an initial model for binding of the peptide to the CDR region of the 2A10  
253 F<sub>AB</sub> fragment (**Fig. 2C**). We then performed, in triplicate, three 50 ns MD simulations  
254 on this complex to investigate whether the interaction was stable over such a time  
255 period (**S2 Mov., S3 Fig.**). These simulations confirmed that the binding mode that  
256 was modeled is stable, suggesting that it is a reasonable approximation of the  
257 interaction between these molecules. To experimentally verify whether our model of  
258 the 2A10 F<sub>AB</sub>:(NANP)<sub>6</sub> peptide interaction was plausible, we performed site directed  
259 mutagenesis of residues predicted to be important for binding. Our model predicted  
260 that the interaction with (NANP)<sub>6</sub> would be mainly between CDR2 and CDR3 of the  
261 light chain and CDR2 and CDR3 of the heavy chain (**Fig. 2C**).

262

263         In the light chain (**Fig. 3A,B**), Y38 is predicted to be one of the most  
264 important residues in the interaction; it contributes to the formation of a hydrophobic  
265 pocket that buries a proline residue and is within hydrogen bonding distance, *via* its  
266 hydroxyl group, to a number of backbone and side-chain groups of the peptide. Loss  
267 of this side-chain abolished binding. Y56 also forms part of the same proline-binding  
268 pocket as Y38, and loss of this side-chain also resulted in an almost complete loss of  
269 binding. R109 forms a hydrogen bond to an asparagine residue on the side of the  
270 helix; mutation of this residue to alanine results in a partial loss of binding. Y116 is  
271 located at the center of the second proline-binding pocket; since loss of the entire  
272 side-chain through an alanine mutation would lead to general structural disruption of  
273 the F<sub>AB</sub> fragment, we mutated this to a phenylalanine (removing the hydroxyl group),

274 which led to a significant reduction in binding. Finally, S36A was selected as a  
275 control: the model indicated that it was outside the binding site, and the ELISA data  
276 indicated that had no effect on (NANP)<sub>n</sub> binding.

277

278         Within the heavy chain (**Fig. 3C,D**), mutation of N57 to alanine led to  
279 complete loss of binding, which is consistent with it forming a hydrogen bond to a  
280 side-chain asparagine but also being part of a relatively well packed region of the  
281 binding site that is mostly buried upon binding. T66 is located on the edge of the  
282 binding site and appears to provide hydrophobic contacts through its methyl group  
283 with the methyl side-chain of an alanine of the peptide; mutation of this residue  
284 resulted in a partial loss of binding. Interestingly, mutation of E64, which is location  
285 in an appropriate position to form some hydrogen bonds to the peptide resulted in a  
286 slight increase in binding, although charged residues on the edge of protein:protein  
287 interfaces are known to contribute primarily to specificity rather than affinity [32].  
288 Specifically, the cost of desolvating charged residues such as glutamate is not  
289 compensated for by the hydrogen bonds that may be formed with the binding partner.  
290 Y37 is located outside the direct binding site in the apo-crystal structure; the loss of  
291 affinity could arise from long-range effects, such as destabilization of the position of  
292 nearby loops. In general, the effects of the mutations are consistent with the model of  
293 the interaction.

294

### 295 **The multivalency of the CSP repeat region**

296

297         The binding mode of the F<sub>AB</sub> fragment to the (NANP)<sub>6</sub> peptide is centered on  
298 two proline residues from two non-adjacent NANP-repeats (**Fig. 3A, C**). These cyclic

299 side-chains are hydrophobic in character and are buried deeply in the core of the F<sub>AB</sub>  
300 antigen binding site, into hydrophobic pockets formed by Y38 and Y56 of the light  
301 chain and the interface between the two chains. In contrast, the polar asparagine  
302 residues on the sides of the helix are involved in hydrogen bonding interactions with a  
303 number of polar residues on the edge of the binding site, such as N57 of the heavy  
304 chain. Due to the twisting of the (NANP)<sub>6</sub> repeat, the binding epitope of the peptide is  
305 2.5-3 alternate NANP repeats, with a symmetrical epitope available for binding on the  
306 opposite face (**Fig. 4A**). Thus, this binding mode is consistent with the stoichiometry  
307 of the binding observed in the ITC measurements, where we observed a stoichiometry  
308 of two 2A10 F<sub>AB</sub> fragments per (NANP)<sub>6</sub> peptide. To investigate whether this binding  
309 mode was also compatible with the indication from ITC that ~10.7 2A10 F<sub>AB</sub>  
310 fragments, or six antibodies (containing 12 F<sub>AB</sub> domains) could bind the CSP protein  
311 (**Table 1**), we extended the peptide to its full length. It is notable that the slight twist  
312 in the NANP helix results in the epitope being offset along the length of the repeat  
313 region, thereby allowing binding of ten 2A10 F<sub>AB</sub> fragments (**Fig. 4B**). Six 2A10  
314 antibodies can bind if two antibodies interact by a single F<sub>AB</sub> domain and the other  
315 four interact with both F<sub>AB</sub> domains. The observation that the F<sub>AB</sub> fragments bind  
316 sufficiently close to each other to form hydrogen bonds also explains the observation  
317 from the ITC that the complexes with rCSP, which allow adjacent F<sub>AB</sub> fragment  
318 binding, have more favorable binding enthalpy, i.e. the additional bonds formed  
319 between adjacent F<sub>AB</sub> fragments further stabilize the complex and lead to greater  
320 affinity (**Table 1**). Thus, the initially surprising stoichiometry that we observe through  
321 ITC appears to be quite feasible based on the structure of the NANP-repeat region of  
322 the rCSP protein and the nature of the rCSP-2A10 complex. It is also clear that the  
323 effect of antibody binding to this region would be to prevent the linker flexing

324 between the N- and C-terminal domains and maintaining normal physiological  
325 function, explaining the neutralizing effect of the antibodies.

326

327 **Identification of endogenous (NANP)<sub>n</sub> specific B cells to determine the BCR**  
328 **repertoire**

329

330 We next set out to determine the implications of our structure for the B cell  
331 response to CSP. Because the CSP protein could conceivably cross-link multiple B  
332 cell receptors (BCRs) we hypothesized that the B cell response might be T-  
333 independent. As a tool to test this hypothesis we used (NANP)<sub>n</sub>-based tetramers to  
334 identify and phenotype antigen specific B cells in mice immunized with *P. berghei*  
335 sporozoites expressing the repeat region of the *P. falciparum* CSP (*P. berghei* CS<sup>Pf</sup>)  
336 [15]. The tetramers are formed by the binding of 4 biotinylated (NANP)<sub>9</sub> repeats with  
337 streptavidin conjugated phycoerythrin (PE) or allophycocyanin (APC). To validate  
338 our tetramer approach, mice were immunized with either *P. berghei* CS<sup>Pf</sup> or another  
339 line of *P. berghei* with a mutant CSP (*P. berghei* CS<sup>5M</sup>) that contains the endogenous  
340 (*P. berghei*) repeat region, which has a distinct repeat sequence (PPPPNPND)<sub>n</sub>.  
341 (NANP)<sub>n</sub>-specific cells were identified with two tetramer probes bound to different  
342 conjugates to exclude B cells that are specific for the PE or APC components of the  
343 tetramers which are numerous in mice [33]. We found that mice immunized with *P.*  
344 *berghei* CS<sup>Pf</sup> sporozoites developed large tetramer double positive populations, which  
345 had class switched (**Fig. 5A and B**). In contrast, the number of tetramer double  
346 positive cells in mice receiving control parasites was the same as in unimmunized  
347 mice; moreover these cells were not class switched and appeared to be naïve  
348 precursors indicating that our tetramers are identifying bona-fide (NANP)<sub>n</sub>-specific

349 cells (**Fig. 5B** and **C**). Further analysis of the different populations of B cells showed  
350 that most B cells present at this time-point were  $GL7^+ CD38^-$  indicating that they are  
351 GC B cells in agreement with results from a recent publication [34] (**Fig. 5B** and **D**).  
352 Given that T cells are required to sustain GC formation beyond ~3 days these data  
353 indicate that a T-dependent response can develop to CSP following sporozoite  
354 immunization [35].

355

### 356 **The B cell response to the (NANP)<sub>n</sub> repeat has both T-independent and T-** 357 **dependent components**

358

359 Our previous data showing GC formation among (NANP)<sub>n</sub> specific B cells  
360 was indicative of a T-dependent response. To determine whether there might also be a  
361 T-independent component to the B cell response we immunized  $CD28^{-/-}$  mice as well  
362 as C57BL/6 controls with *P. berghei* CS<sup>Pf</sup> radiation attenuated sporozoites (RAS) and  
363 measured serum (NANP)<sub>n</sub> specific antibody by ELISA and the B cell response using  
364 our Tetramers.  $CD28^{-/-}$  mice have  $CD4^+$  T cells but they are unable to provide help to  
365 B cell responses [36]. Interestingly 4 days post immunization there were comparable  
366 IgM and IgG anti-(NANP)<sub>n</sub> responses in the  $CD28^{-/-}$  mice and control animals (**Fig.**  
367 **6A**), indicative of a T-independent component to immunity. However by day 27 post  
368 immunization there was no detectable IgM or IgG antibody specific for (NANP)<sub>n</sub> in  
369 the  $CD28^{-/-}$  mice suggesting the T-independent response is short-lived. We further  
370 analyzed (NANP)<sub>n</sub> specific B cell responses using our tetramers, in particular  
371 examining the number and phenotype (plasmablast vs GC B cell) of activated  $IgD^-$   
372 Tetramer<sup>+</sup> cells (**Fig. 6B**). In agreement with our antibody data, similar numbers of  
373 antigen specific B cells were seen at 4 days post immunization in the  $CD28^{-/-}$  and



374 control mice and most of these cells were plasmablasts (**Fig. 6C**). However by 7 days  
375 post immunization the number of antigen specific cells declines in the CD28<sup>-/-</sup> mice as  
376 the T dependent GC reaction begins to predominate. Thus CSP on the surface of  
377 sporozoites is able to induce short-lived T-independent B cell response, but  
378 subsequently T-dependent responses predominate.

379

380 We wanted to know if to induce a T-independent response it was necessary for  
381 CSP to be presented on the surface of the sporozoite or if free rCSP was sufficient.

382 We found that indeed rCSP could induce a T-independent response as evidenced by  
383 similar IgM and IgG levels and IgD<sup>-</sup>Tetramer<sup>+</sup> responses 4 days post immunization in  
384 control and CD28<sup>-/-</sup> mice (**Fig. 6D, E**). Finally we were concerned that there may be  
385 some residual CD4<sup>+</sup> T cell help in the CD28<sup>-/-</sup> mice so we performed experiments in  
386 which we used the antibody GK1.5 to deplete CD4<sup>+</sup> T cells [37]. In agreement with  
387 our previous data we found that sporozoites (live or RAS) and rCSP induced IgM  
388 responses in CD4 depleted mice, though we were unable to detect a significant IgG  
389 response (**Fig. S4 A**). We also detected primed antigen specific B cells in GK1.5  
390 treated mice following RAS or rCSP immunized mice 4 days post-immunization,  
391 albeit at lower levels than in mice treated with isotype control antibodies (**Fig. S4 B**).  
392 Overall our data with GK1.5 depleted mice support our results in the CD28<sup>-/-</sup> model.

393

#### 394 **A restricted repertoire of BCRs can bind to the (NANP)<sub>n</sub> repeat**

395

396 Our ability to identify and sort (NANP)<sub>n</sub> specific B cells with our tetramers  
397 also allows us to examine the repertoire of antibodies that can bind the (NANP)<sub>n</sub> by  
398 sequencing the BCRs of the identified cells. While the repeat structure of CSP has

399 been hypothesized to induce a broad polyclonal response [38], an alternative  
400 hypothesis is that the antigenically simple structure of the repeat epitope might only  
401 be recognized by a small number of naïve B cells. We therefore sorted (NANP)<sub>n</sub>-  
402 specific cells 35 days post immunization of BALB/C mice with sporozoites. We  
403 performed this analysis in BALB/C mice as this is the background of mice from  
404 which the 2A10 antibody was derived. We then prepared cDNA from the cells and  
405 amplified the heavy and kappa chain sequences using degenerate primers as described  
406 previously [39,40]. Heavy and light chain libraries were prepared from 4 immunized  
407 mice as well as from 3 naïve mice from which we bulk sorted B cells as controls. We  
408 obtained usable sequences from 3 of the 4 mice for both the heavy chain and kappa  
409 chain. Analysis of the heavy chain revealed that in each mouse 3 or 4 V regions  
410 dominated the immune response (**Fig. 7A**). The V regions identified (IGHV1-20;  
411 IGHV1-26; IGHV1-34 and IGHV5-9) were generally shared among the mice. As a  
412 formal measure of the diversity of our V region usage in the (NANP)<sub>n</sub> specific cells  
413 and the bulk B cells from naïve mice we calculated the Shannon entropy for these  
414 populations. This analysis formally demonstrated that the diversity of the antigen  
415 specific B cells was significantly lower than the diversity of the repertoire in naïve  
416 mice (**Fig. 7B**). We further found that each V region was typically associated with the  
417 same D and J sequences even in different mice. For example, IGHV1-20 was  
418 typically associated with J4, IGHV5-9 with J4 while in different mice IGHV1-34 was  
419 variously paired with J1 or J4 (**Fig. 7C**). Similar results were obtained for the kappa  
420 chain with the response dominated by IGKV1-135; IGKV5-43/45; IGKV1-110;  
421 IGKV1-117 and IGKV14-111 (**Fig. 7D and E**). The V regions were typically paired  
422 with the same J regions even in different mice (**Fig. 7F**), for example IGKV5.43/45  
423 was typically paired with IGKJ5 or IGKJ2 and IGKV1-110 was typically paired with

424 IGKJ5, although IGKV1-135 was typically more promiscuous. One limitation of our  
425 high throughput sequencing approach is that the degenerate primers only amplified  
426 ~70% of the known IGHV and IGKV sequences in naïve mice, suggesting that we  
427 may not capture the full diversity of the response. However, comparison with the 5  
428 published antibody sequences (**S2** and **S3 Table**) that include IGHV-1-20, IGKV5-45  
429 and IGKV1-110 reveals that we are likely capturing the bulk of the antibody diversity.  
430 Together these data suggest that the number of B cell clones responding to CSP may  
431 be limited, potentially reducing the ability of the immune system to generate effective  
432 neutralizing antibodies.

433

#### 434 **CSP-binding antibodies undergo somatic hypermutation to improve affinity**

435

436 Finally we were interested in knowing if the GC reaction we could see  
437 following sporozoite immunization was inducing higher affinity antibodies. We  
438 therefore examined our deep sequencing data to determine if CSP-specific antibodies  
439 had undergone somatic hypermutation (SHM) that would be indicative of B cells  
440 specific for CSP entering the GC. Taking advantage of the fact that our kappa chain  
441 primers capture the entire V-J sequences of the antibodies we sequenced we asked: 1)  
442 if the kappa chains shared between immune animals differed from the germline  
443 (providing evidence of SHM) and 2) if the mutations were conserved between  
444 different mice indicative of directed selection. Analysis of the reads from the kappa  
445 chains of the three immune mice showed that these had a much higher degree of  
446 mutation than bulk B cells from naïve mice, demonstrating SHM in the CSP-specific  
447 antibodies (**Fig. 8A**). We further examined each specific common kappa chain in turn  
448 (IGVK1-110; IGKV1-135; IGVK5-43/45) comparing the sequences obtained from

449 naïve B cells and (NANP)<sub>n</sub> specific cells in immune mice. This analysis showed that  
450 while, as expected, sequences from naïve mice contained few mutations, the  
451 sequences from immune mice had much higher levels of SHM. Importantly mutations  
452 were found to be concentrated in the CDR loops, and were frequently shared by  
453 immunized mice providing strong circumstantial evidence for affinity maturation  
454 (**Fig. 8B**; data for IGVK1-110 only shown).

455

456         To directly test if CSP-binding antibodies undergo affinity maturation we  
457 expressed the predicted germline precursor to the 2A10 antibody (2A10 gAb) in  
458 HEK293T cells. We identified the predicted germline precursors of the 2A10 heavy  
459 and light chains using the program V-quest [41] (**Figs. S5 and S6**). This analysis  
460 identified the heavy chain as IGHV9-3; IGHD1-3; IGHJ4 and the light chain as  
461 IGKV10-94;IGKJ2, with the monoclonal antibody carrying 6 mutations in the heavy  
462 chain and 7 in the light chain. The 2A10 gAb had considerably lower binding in  
463 ELISA assays compared to the 2A10 mAb itself (**Fig. 8C**), indicative that affinity  
464 maturation had taken place in this antibody. To determine the relative contribution of  
465 mutations in the heavy and light chain to enhancing binding we also made hybrid  
466 antibodies consisting of the mAb heavy chain and the gAb light chain and vice versa.  
467 Interestingly mutations in the light chain were almost entirely sufficient to explain the  
468 enhanced binding by the mAb compared to the gAb (**Fig. 8C**).

469

470         To identify the specific mutations that were important we introduced the  
471 mutations individually into the gAb light chain construct. We prioritized mutations  
472 that were shared with the 27E antibody which has previously been found to be  
473 clonally related to 2A10 having been isolated from the same mouse and which shares

474 the same germline heavy and light chains as the 2A10 mAb [20]. We found that two  
475 mutations (L114F and T117V) in the CDR3 of the light chain appeared to account for  
476 most of the gain in binding (**Fig. 8C**). The effect of these antibodies appeared to be  
477 additive rather than synergistic as revealed by experiments in which we introduced  
478 these mutations simultaneously (**Fig. 8D**). A further mutation close to the light chain  
479 CDR2 (H68Y) also caused a modest increase in binding. As expected mutations in the  
480 heavy chains appeared generally less important for increasing binding though M39I,  
481 N59I and T67F all gave modest increases in binding (**Fig. 8E**). Collectively our data  
482 suggest that CSP repeat antibodies can undergo SHM in GCs resulting in affinity  
483 maturation, however the antibody response may be limited by the number of naïve B  
484 cells that can recognize and respond to this antigen.  
485

## 486 **Discussion**

487

488           Here we provide an analysis of the structure of a *Plasmodium falciparum*  
489 sporozoite-neutralizing antibody (2A10). Having obtained this structure we further  
490 modeled the binding 2A10 with its antigen target, the repeat region of CSP, and  
491 provide a thermodynamic characterization of this interaction. Finally, we used novel  
492 tetramer probes to identify and sort antigen specific B cells responding to sporozoite  
493 immunization in order to measure the diversity and maturation of the antibody  
494 response. We found that the avidity of 2A10 for the rCSP molecule was in the  
495 nanomolar range, which was much higher than the affinity previously predicted from  
496 competition ELISAs with small peptides [22,23]. This affinity is a consequence of the  
497 multivalent nature of the interaction, with up to 6 antibodies being able to bind to each  
498 rCSP molecule. Our model suggests that to spatially accommodate this binding the  
499 antibodies must surround CSP in an off-set manner, which is possible due to the slight  
500 twist in the helical structure that CSP can adopt. It is notable that the twisted,  
501 repeating arrangement of the CSP linker is the only structure that would allow binding  
502 in the stoichiometry observed through the ITC. We further found that the diversity of  
503 the antibody repertoire to the CSP repeat was limited, perhaps due to the relative  
504 simplicity of the target epitope. However, these antibodies have undergone affinity  
505 maturation to improve affinity, potentially allowing protective immune responses to  
506 develop.

507

508           Using ITC we determined the dissociation constant of 2A10 for rCSP to be 2.7  
509 nM, which is not unusual for a mouse mAb. However it is a tighter interaction than  
510 that predicted from competition ELISAs, which predicted a micro-molar affinity

511 [22,23]. However, these competition ELISAs were performed with short peptides  
512 rather than rCSP. Indeed, when we performed ITC with a short peptide and F<sub>AB</sub>  
513 fragments we too obtained a dissociation constant in the micro-molar range (0.42  
514 μM). The difference between the F<sub>AB</sub> binding to the peptide and the tight interaction  
515 of the antibody binding to full length CSP appears to be driven by a high avidity,  
516 multivalent interaction. There is also additional enthalpic stabilization (per F<sub>AB</sub>  
517 domain) in the 2A10:CSP complex, although this is partially offset by the increased  
518 entropic cost associated with combining a large number of separate molecules into a  
519 single complex. One caveat of these data is that we used a slightly truncated repeat in  
520 our recombinant CSP, however it is likely that longer repeats will have further  
521 stabilization of the interaction that could result in even higher affinity interaction  
522 between CSP and binding antibodies.

523

524         The mechanism of sporozoite neutralization remains unclear, however our  
525 structural data may provide some insights. Repeat specific antibodies can directly  
526 neutralize sporozoites (without complement or other cell mediators) in the  
527 circumsporozoite reaction [8,42]. Moreover F<sub>AB</sub> fragments alone are sufficient to  
528 block invasion [42,43]. However, it is well established that activation for complement  
529 and cell mediated immunity is important for the action of blood stage-specific  
530 antibodies [44,45]. It has also been suggested that the CSP repeat might act as a hinge  
531 allowing the N-terminal domain to mask the C-terminal domain which is believed to  
532 be important for binding to and invading hepatocytes [10]. Cleavage of this N-  
533 terminal domain is therefore required to expose the C-terminal domain and facilitate  
534 invasion [10]. Antibody binding as observed here may disrupt this process in several  
535 ways, either by opening the hinge to induce the premature exposure of the C-terminal

536 domain. Alternatively since the repeat region is directly adjacent to the proteolytic  
537 cleavage site, anti-repeat antibodies might function by sterically hindering access of  
538 the protease to CSP, thus preventing sporozoite invasion of the hepatocyte. One  
539 possible consequence of the requirement for multivalency to increase the avidity of the  
540 antibody, is that antibodies with different binding modes may interfere with each  
541 other limiting their effectiveness.

542

543 Our results uncovering how neutralizing antibodies bind to CSP has several  
544 implications for understanding the development of the immune response to CSP.  
545 Notably the finding that the CSP molecule can be bound by multiple antibodies/B cell  
546 receptors raises the possibility that this molecule can indeed crosslink multiple BCRs  
547 and potentially act as a type-II T independent antigen [17]. We find that indeed there  
548 is a T-independent component to the response to CSP, though T cells are required to  
549 sustain the immune response beyond day 7. As such the response to CSP appears  
550 follow a similar process to that seen for several oligomeric viral entry proteins, which  
551 induce a mix of T-independent and T-dependent responses [18,19]. It maybe that T-  
552 independent responses are driven by the density of CSP molecules on the sporozoite  
553 surface; however, rCSP can also induce a small T-independent response. This  
554 suggests that the CSP protein alone is sufficient to crosslink multiple BCRs on the B  
555 cell surface which is consistent with our structural model. Interestingly, the  
556 RTS,S/AS01 vaccine based on that contains 18 CSP repeats and does appear to induce  
557 high titers of anti-CSP antibodies which initially decline rapidly and are then more  
558 stable [4,46]. This may be consistent with the induction of a short-lived a type-II T-  
559 independent plasmablast response (accounting for the initial burst of antibodies),  
560 followed by a T-dependent response (which may be the basis of the more sustained



561 antibody titers). The relative contributions of short-lived antibody production and  
562 long-term B cell memory to protection is an area for future investigation.

563

564           The finding of a limited repertoire in the BCR sequences specific for the  
565 (NANP)<sub>n</sub> repeat contradicts previous suggestions that the response to CSP might be  
566 broad and polyclonal [38]. One explanation for this limited antibody diversity is that  
567 the antigenic simplicity of the CSP repeat region limits the range of antibodies that are  
568 capable of responding. A prior example of this is the antibodies to the Rhesus (Rh) D  
569 antigen. The RhD antigen differs from RhC by only 35-36 amino acids, resulting in  
570 the creation of a minimal B cell epitope [47]. The repertoire of antibodies that can  
571 bind this epitope are accordingly limited and mainly based on the VH3-33 gene  
572 family [48]. Another potential explanation for a limited antibody repertoire could be  
573 that the (NANP)<sub>n</sub> repeat shares structural similarity with a self-antigen as is  
574 speculated to happen with meningococcus type B antigens [49], however it is not  
575 clear what this self-antigen might be. One potential outcome of this finding is that if  
576 each B cell clone has a finite burst size this may limit the magnitude of the overall B  
577 cell response.

578

579           One area for future investigation is to determine the binding modes and  
580 sporozoite neutralizing capacities of other antibodies in the response. It is clear that  
581 not all CSP-repeat binding antibodies have the same capacity for sporozoite  
582 neutralization [7]. As such the finding of a limited repertoire of responding B cells  
583 may lead to the possibility that some people have holes in their antibody repertoires  
584 limiting their ability to make neutralizing antibodies. This may explain why, while

585 there is a broad correlation between ELISA titres of antibodies to the CSP repeat and  
586 protection following RTS,S vaccination, there is no clear threshold for protection [4].

587

588         While our work has been performed with mouse antibodies, there are major  
589 similarities between mouse and human antibody loop structure [50]. The main  
590 difference between the two species is the considerably more diverse heavy chain  
591 CDR3 regions that are found in human antibodies [51]. Consequently, this leads to a  
592 much larger number of unique clones found in humans compared to mice. However,  
593 the number of different V, D and J genes and the recombination that follows are  
594 relatively similar between humans and mice [52]. From our data it can be observed  
595 that while the BCR repertoire was restricted in the V gene usage, these different V  
596 gene populations were represented in multiple unique clones, suggesting that  
597 increasing the number of clones is unlikely to substantially increase V-region usage.  
598 Our analysis was also performed on inbred mice which may also limit repertoire  
599 diversity, however studies on the human IGHV locus reveal that in any given  
600 individual ~80% V region genes are identical between the maternal and paternal allele  
601 i.e. heterozygosity is not a major driver of human V region diversity [53,54]. It is  
602 notable that all 4 human monoclonal antibodies described to date from different  
603 volunteers share the use of the IGHV3-30 gene family [21,22], suggesting that in  
604 humans as well as mice there may indeed be a constrained repertoire of responding B  
605 cells.

606

607         Overall our data provide important insights into how the antibody response to  
608 CSP develops. Our results also help explain why relatively large amounts of  
609 antibodies are required for sporozoite neutralization and suggest that the ability to

610 generate an effective B cell response may be limited by the very simplicity of the  
611 repeat epitope. These data support previous suggestions that CSP may be a  
612 suboptimal target for vaccination. However, we also find that CSP binding antibodies  
613 can undergo somatic hypermutation and reach high affinities. This suggests if we can  
614 develop vaccination strategies to diversify the repertoire of responding B cells and  
615 favor the GC response it may be possible to generate long-term protective immunity  
616 targeting this major vaccine candidate antigen.  
617  
618

619 **Methods**

620

621 **Ethics statement**

622 All animal procedures were approved by the Animal Experimentation Ethics  
623 Committee of the Australian National University (Protocol numbers: A2013/12;  
624 A2014/62 and A2015/76). All research involving animals was conducted in  
625 accordance with the National Health and Medical Research Council's (NHMRC)  
626 Australian Code for the Care and Use of Animals for Scientific Purposes and the  
627 Australian Capital Territory Animal Welfare Act 1992.

628

629 **Mice, Immunizations and Cell Depletions**

630 BALB/C, C57BL/6 or CD28<sup>-/-</sup> [55] mice (bred in-house at the Australian National  
631 University) were immunized IV with  $5 \times 10^4$  *P. berghei* CS<sup>5M</sup> sporozoites expressing  
632 mCherry [56] or  $5 \times 10^4$  *P. berghei* CS<sup>Pf</sup> sporozoites dissected by hand from the  
633 salivary glands of *Anopheles stephensi* mosquitoes. Mice were either infected with  
634 live sporozoites and then treated with 0.6mg chloroquine IP daily for 10 days or  
635 immunized with irradiated sporozoites (15kRad). For immunization with rCSP, 30ug  
636 rCSP was emulsified in Imject<sup>TM</sup> Alum according to the manufacturer's instructions  
637 (ThermoFisher Scientific) and delivered intra-peritoneally. To deplete CD4<sup>+</sup> T cells  
638 mice were treated with two doses of 100ug GK1.5 antibody on the 2 days prior to  
639 immunization (BioXCell); control mice received an irrelevant isotype control  
640 antibody (LTF2; BioXCell).

641

642 **Flow Cytometry and sorting**

643 Single cell preparations of lymphocytes were isolated from the spleen of immunized  
644 mice and were stained for flow cytometry or sorting by standard procedures. Cells  
645 were stained with lineage markers (anti-CD3, clone 17A2; anti-GR1, clone RB6-8C5  
646 and anti-NKp46, clone 29A1.4) antibodies to B220 (clone RA3-6B2), IgM (clone  
647 II/41), IgD (clone 11-26c2a), GL7 (clone GL7), CD38 (clone 90), CD138 (clone 281-  
648 2) and (NANP)<sub>9</sub> tetramers conjugated to PE or APC. Antibodies were purchased from  
649 Biologend while tetramers were prepared in house by mixing biotinylated (NANP)<sub>9</sub>  
650 peptide with streptavidin conjugated PE or APC (Invitrogen) in a 4:1 molar ratio.  
651 Flow-cytometric data was collected on a BD Fortessa flow cytometer (Becton  
652 Dickinson) and analyzed using FlowJo software (FlowJo). Where necessary cells  
653 were sorted on a BD FACs Aria I or II machine.

654

655 **Sequencing of (NANP)<sub>n</sub> specific cells and BCR analysis**

656 Single cell suspensions from the spleens of immunized mice were stained with  
657 (NANP)<sub>n</sub> tetramers and antibodies to B cell markers as described in the  
658 supplementary experimental procedures. Antigen specific cells were sorted on a  
659 FACS ARIA I or II instrument prior to RNA extraction with the Arturus Picopure  
660 RNA isolation kit (Invitrogen) and cDNA preparation using the iScript cDNA  
661 synthesis kit (BioRad). BCR sequences were amplified using previously described  
662 heavy and kappa chain primers including adaptor sequences allowing subsequent  
663 indexing using the Nextera indexing kit (Illumina). Analysis was performed in house  
664 using R-scripts and the program MiXCR as described in supplementary experimental  
665 procedures.

666

667 **Binding of antibody variants**

668 Variants of the 2A10 antibody were expressed in HEK293 T cells (a kind gift of  
669 Carola Vinuesa, Australian National University) as described in the supplemental  
670 experimental procedures. Binding to the CSP repeat was tested by ELISA and ITC  
671 using standard techniques as described in the supplementary experimental procedures.  
672

673 **Statistical Analysis**

674 Statistical analysis was performed using Prism6 (GraphPad) for simple T tests and  
675 one-way ANOVAs from single experiments. Where data were pooled from multiple  
676 experiments, analysis was performed using linear mixed models in R version 3.3.3 (R  
677 foundation for Statistical Computing). Linear mixed models are a regression analysis  
678 model containing both fixed and random effects: fixed effects being the  
679 variable/treatment under examination, whilst random effects are unintended factors  
680 that may influence the variable being measured. If significance was found from  
681 running a linear mixed model, pair-wise comparisons of the least significant  
682 differences of means (LSD) was undertaken to determine at which level interactions  
683 were occurring. Statistical significance was assumed if the *p*-value was < 0.05 for a  
684 tested difference. (ns = not significant, \* =  $p < 0.05$ , \*\* =  $p < 0.01$ , \*\*\* =  $p < 0.001$ ,  
685 \*\*\*\* =  $p < 0.0001$ ).

686

687

688 **Data Deposition**

689 Sequence data generated in this paper is deposited at the NCBI BioProject database  
690 accession number PRJNA352758. Atomic coordinates and related experimental data

691 for structural analyses are deposited in the Protein Data Bank (PDB) with PDB codes

692 5ZSF and 5TOY.

693 **Acknowledgments**

694

695 We thank the C3 Crystallisation Centre at CSIRO for help with crystal formation and  
696 the Australian Synchrotron and beamline scientists for help with data collection. We  
697 thank Michael Devoy, Harpreet Vohra and Catherine Gillespie of the Imaging and  
698 Cytometry Facility at the John Curtin School of Medical Research for assistance with  
699 flow cytometry and multi-photon microscopy.

700



## 701   **References**

- 702   1. World Health Organization (2016) World Malaria Report 2016. Geneva: World  
703       Health Organization.
- 704   2. Casares S, Brumeanu TD, Richie TL (2010) The RTS,S malaria vaccine. *Vaccine*  
705       28: 4880-4894.
- 706   3. RTS,S Clinical Trials Partnership (2015) Efficacy and safety of RTS,S/AS01  
707       malaria vaccine with or without a booster dose in infants and children in  
708       Africa: final results of a phase 3, individually randomised, controlled trial.  
709       *Lancet* 386: 31-45.
- 710   4. White MT, Bejon P, Olotu A, Griffin JT, Riley EM, et al. (2013) The relationship  
711       between RTS,S vaccine-induced antibodies, CD4(+) T cell responses and  
712       protection against *Plasmodium falciparum* infection. *PLoS One* 8: e61395.
- 713   5. Nussenzweig RS, Vanderberg J, Most H, Orton C (1967) Protective immunity  
714       produced by the injection of x-irradiated sporozoites of *plasmodium berghei*.  
715       *Nature* 216: 160-162.
- 716   6. Seder RA, Chang LJ, Enama ME, Zephir KL, Sarwar UN, et al. (2013) Protection  
717       against malaria by intravenous immunization with a nonreplicating sporozoite  
718       vaccine. *Science* 341: 1359-1365.
- 719   7. Hollingdale MR, Nardin EH, Tharavanij S, Schwartz AL, Nussenzweig RS (1984)  
720       Inhibition of entry of *Plasmodium falciparum* and *P. vivax* sporozoites into  
721       cultured cells; an in vitro assay of protective antibodies. *J Immunol* 132: 909-  
722       913.
- 723   8. Yoshida N, Nussenzweig RS, Potocnjak P, Nussenzweig V, Aikawa M (1980)  
724       Hybridoma produces protective antibodies directed against the sporozoite  
725       stage of malaria parasite. *Science* 207: 71-73.
- 726   9. Dame JB, Williams JL, McCutchan TF, Weber JL, Wirtz RA, et al. (1984)  
727       Structure of the gene encoding the immunodominant surface antigen on the  
728       sporozoite of the human malaria parasite *Plasmodium falciparum*. *Science*  
729       225: 593-599.
- 730   10. Coppi A, Natarajan R, Pradel G, Bennett BL, James ER, et al. (2011) The malaria  
731       circumsporozoite protein has two functional domains, each with distinct roles  
732       as sporozoites journey from mosquito to mammalian host. *J Exp Med* 208:  
733       341-356.
- 734   11. Zavala F, Cochrane AH, Nardin EH, Nussenzweig RS, Nussenzweig V (1983)  
735       Circumsporozoite proteins of malaria parasites contain a single  
736       immunodominant region with two or more identical epitopes. *J Exp Med* 157:  
737       1947-1957.
- 738   12. Gardner MJ, Hall N, Fung E, White O, Berriman M, et al. (2002) Genome  
739       sequence of the human malaria parasite *Plasmodium falciparum*. *Nature* 419:  
740       498-511.
- 741   13. Zeeshan M, Alam MT, Vinayak S, Bora H, Tyagi RK, et al. (2012) Genetic  
742       variation in the *Plasmodium falciparum* circumsporozoite protein in India and  
743       its relevance to RTS,S malaria vaccine. *PLoS One* 7: e43430.
- 744   14. Espinosa DA, Gutierrez GM, Rojas-Lopez M, Noe AR, Shi L, et al. (2015)  
745       Proteolytic Cleavage of the *Plasmodium falciparum* Circumsporozoite Protein  
746       Is a Target of Protective Antibodies. *J Infect Dis* 212: 1111-1119.
- 747   15. Persson C, Oliveira GA, Sultan AA, Bhanot P, Nussenzweig V, et al. (2002)  
748       Cutting edge: a new tool to evaluate human pre-erythrocytic malaria vaccines:

- 749 rodent parasites bearing a hybrid *Plasmodium falciparum* circumsporozoite  
750 protein. *J Immunol* 169: 6681-6685.
- 751 16. Schofield L, Uadia P (1990) Lack of Ir-Gene Control in the Immune-Response to  
752 Malaria .1. A Thymus-Independent Antibody-Response to the Repetitive  
753 Surface Protein of Sporozoites. *Journal of Immunology* 144: 2781-2788.
- 754 17. Defrance T, Taillardet M, Genestier L (2011) T cell-independent B cell memory.  
755 *Current Opinion in Immunology* 23: 330-336.
- 756 18. Bachmann MF, Hengartner H, Zinkernagel RM (1995) T helper cell-independent  
757 neutralizing B cell response against vesicular stomatitis virus: role of antigen  
758 patterns in B cell induction? *Eur J Immunol* 25: 3445-3451.
- 759 19. Schodel F, Peterson D, Zheng J, Jones JE, Hughes JL, et al. (1993) Structure of  
760 hepatitis B virus core and e-antigen. A single precore amino acid prevents  
761 nucleocapsid assembly. *J Biol Chem* 268: 1332-1337.
- 762 20. Anker R, Zavala F, Pollok BA (1990) VH and VL region structure of antibodies  
763 that recognize the (NANP)<sub>3</sub> dodecapeptide sequence in the circumsporozoite  
764 protein of *Plasmodium falciparum*. *Eur J Immunol* 20: 2757-2761.
- 765 21. Foquet L, Hermsen CC, van Gemert GJ, Van Braeckel E, Weening KE, et al.  
766 (2014) Vaccine-induced monoclonal antibodies targeting circumsporozoite  
767 protein prevent *Plasmodium falciparum* infection. *J Clin Invest* 124: 140-144.
- 768 22. Chappel JA, Rogers WO, Hoffman SL, Kang AS (2004) Molecular dissection of  
769 the human antibody response to the structural repeat epitope of *Plasmodium*  
770 *falciparum* sporozoite from a protected donor. *Malar J* 3: 28.
- 771 23. Zavala F, Tam JP, Hollingdale MR, Cochrane AH, Quakyi I, et al. (1985)  
772 Rationale for development of a synthetic vaccine against *Plasmodium*  
773 *falciparum* malaria. *Science* 228: 1436-1440.
- 774 24. Cerami C, Frevert U, Sinnis P, Takacs B, Clavijo P, et al. (1992) The basolateral  
775 domain of the hepatocyte plasma membrane bears receptors for the  
776 circumsporozoite protein of *Plasmodium falciparum* sporozoites. *Cell* 70:  
777 1021-1033.
- 778 25. Braden BC, Poljak RJ (1995) Structural features of the reactions between  
779 antibodies and protein antigens. *FASEB J* 9: 9-16.
- 780 26. Plasmeyer ML, Reiter K, Shim RL, Jr., Kotova S, Smith PD, et al. (2009)  
781 Structure of the *Plasmodium falciparum* circumsporozoite protein, a leading  
782 malaria vaccine candidate. *J Biol Chem* 284: 26951-26963.
- 783 27. Kelly SM, Jess TJ, Price NC (2005) How to study proteins by circular dichroism.  
784 *Biochim Biophys Acta* 1751: 119-139.
- 785 28. Shen Y, Maupetit J, Derreumaux P, Tuffery P (2014) Improved PEP-FOLD  
786 Approach for Peptide and Mini-protein Structure Prediction. *J Chem Theory*  
787 *Comput* 10: 4745-4758.
- 788 29. Ghasparian A, Moehle K, Linden A, Robinson JA (2006) Crystal structure of an  
789 NPNA-repeat motif from the circumsporozoite protein of the malaria parasite  
790 *Plasmodium falciparum*. *Chem Commun (Camb)*: 174-176.
- 791 30. Sela-Culang I, Alon S, Ofran Y (2012) A systematic comparison of free and  
792 bound antibodies reveals binding-related conformational changes. *J Immunol*  
793 189: 4890-4899.
- 794 31. Sircar A, Gray JJ (2010) SnugDock: paratope structural optimization during  
795 antibody-antigen docking compensates for errors in antibody homology  
796 models. *PLoS Comput Biol* 6: e1000644.

- 797 32. Davis SJ, Davies EA, Tucknott MG, Jones EY, van der Merwe PA (1998) The  
798 role of charged residues mediating low affinity protein-protein recognition at  
799 the cell surface by CD2. *Proc Natl Acad Sci U S A* 95: 5490-5494.
- 800 33. Pape KA, Taylor JJ, Maul RW, Gearhart PJ, Jenkins MK (2011) Different B cell  
801 populations mediate early and late memory during an endogenous immune  
802 response. *Science* 331: 1203-1207.
- 803 34. Keitany GJ, Kim KS, Krishnamurty AT, Hondowicz BD, Hahn WO, et al. (2016)  
804 Blood Stage Malaria Disrupts Humoral Immunity to the Pre-erythrocytic  
805 Stage Circumsporozoite Protein. *Cell Rep* 17: 3193-3205.
- 806 35. de Vinuesa CG, Cook MC, Ball J, Drew M, Sunners Y, et al. (2000) Germinal  
807 centers without T cells. *J Exp Med* 191: 485-494.
- 808 36. Ferguson SE, Han S, Kelsoe G, Thompson CB (1996) CD28 is required for  
809 germinal center formation. *J Immunol* 156: 4576-4581.
- 810 37. Goronzy J, Weyand CM, Fathman CG (1986) Long-term humoral  
811 unresponsiveness in vivo, induced by treatment with monoclonal antibody  
812 against L3T4. *J Exp Med* 164: 911-925.
- 813 38. Schofield L (1990) The circumsporozoite protein of Plasmodium: a mechanism of  
814 immune evasion by the malaria parasite? *Bull World Health Organ* 68 Suppl:  
815 66-73.
- 816 39. Arnaout R, Lee W, Cahill P, Honan T, Sparrow T, et al. (2011) High-resolution  
817 description of antibody heavy-chain repertoires in humans. *PLoS One* 6:  
818 e22365.
- 819 40. Busse CE, Czogiel I, Braun P, Arndt PF, Wardemann H (2014) Single-cell based  
820 high-throughput sequencing of full-length immunoglobulin heavy and light  
821 chain genes. *Eur J Immunol* 44: 597-603.
- 822 41. Brochet X, Lefranc MP, Giudicelli V (2008) IMGT/V-QUEST: the highly  
823 customized and integrated system for IG and TR standardized V-J and V-D-J  
824 sequence analysis. *Nucleic Acids Res* 36: W503-508.
- 825 42. Potocnjak P, Yoshida N, Nussenzweig RS, Nussenzweig V (1980) Monovalent  
826 fragments (Fab) of monoclonal antibodies to a sporozoite surface antigen  
827 (Pb44) protect mice against malarial infection. *J Exp Med* 151: 1504-1513.
- 828 43. Stewart MJ, Nawrot RJ, Schulman S, Vanderberg JP (1986) Plasmodium berghei  
829 sporozoite invasion is blocked in vitro by sporozoite-immobilizing antibodies.  
830 *Infect Immun* 51: 859-864.
- 831 44. Bouharoun-Tayoun H, Attanath P, Sabchareon A, Chongsuphajaisiddhi T, Druilhe  
832 P (1990) Antibodies that protect humans against Plasmodium falciparum  
833 blood stages do not on their own inhibit parasite growth and invasion in vitro,  
834 but act in cooperation with monocytes. *J Exp Med* 172: 1633-1641.
- 835 45. Boyle MJ, Reiling L, Feng G, Langer C, Osier FH, et al. (2015) Human antibodies  
836 fix complement to inhibit Plasmodium falciparum invasion of erythrocytes  
837 and are associated with protection against malaria. *Immunity* 42: 580-590.
- 838 46. White MT, Bejon P, Olotu A, Griffin JT, Bojang K, et al. (2014) A combined  
839 analysis of immunogenicity, antibody kinetics and vaccine efficacy from  
840 phase 2 trials of the RTS,S malaria vaccine. *BMC Med* 12: 117.
- 841 47. Avent ND, Madgett TE, Lee ZE, Head DJ, Maddocks DG, et al. (2006) Molecular  
842 biology of Rh proteins and relevance to molecular medicine. *Expert Rev Mol  
843 Med* 8: 1-20.
- 844 48. Chang TY, Siegel DL (1998) Genetic and immunological properties of phage-  
845 displayed human anti-Rh(D) antibodies: implications for Rh(D) epitope  
846 topology. *Blood* 91: 3066-3078.

- 847 49. Finne J, Leinonen M, Makela PH (1983) Antigenic similarities between brain  
848 components and bacteria causing meningitis. Implications for vaccine  
849 development and pathogenesis. *Lancet* 2: 355-357.
- 850 50. North B, Lehmann A, Dunbrack RL (2011) A New Clustering of Antibody CDR  
851 Loop Conformations. *Journal of Molecular Biology* 406: 228-256.
- 852 51. Stanfield RL, Wilson IA (2014) Antibody Structure. *Microbiology spectrum* 2.
- 853 52. Lefranc MP, Giudicelli V, Duroux P, Jabado-Michaloud J, Folch G, et al. (2015)  
854 IMGT(R), the international ImMunoGeneTics information system(R) 25 years  
855 on. *Nucleic Acids Res* 43: D413-422.
- 856 53. Boyd SD, Gaeta BA, Jackson KJ, Fire AZ, Marshall EL, et al. (2010) Individual  
857 variation in the germline Ig gene repertoire inferred from variable region gene  
858 rearrangements. *J Immunol* 184: 6986-6992.
- 859 54. Kidd MJ, Chen Z, Wang Y, Jackson KJ, Zhang L, et al. (2012) The inference of  
860 phased haplotypes for the immunoglobulin H chain V region gene loci by  
861 analysis of VDJ gene rearrangements. *J Immunol* 188: 1333-1340.
- 862 55. Shahinian A, Pfeffer K, Lee KP, Kundig TM, Kishihara K, et al. (1993)  
863 Differential T cell costimulatory requirements in CD28-deficient mice.  
864 *Science* 261: 609-612.
- 865 56. Cockburn IA, Tse SW, Zavala F (2014) CD8+ T cells eliminate liver stage  
866 Plasmodium parasites without detectable bystander effect. *Infect Immun*.
- 867 57. Bulheller BM, Hirst JD (2009) DichroCalc--circular and linear dichroism online.  
868 *Bioinformatics* 25: 539-540.
- 869  
870

871 **Supporting Information Legends**

872

873 **Supplementary Methods and Tables:** Contains extended methods; S1 Table (Data  
874 collection and refinement statistics for the crystal structures of 2A10 F<sub>AB</sub> presented in  
875 this work); S2 Table (Heavy chain CDR sequences of CSP binding antibodies); S3  
876 Table (Light chain CDR sequences of CSP binding immunoglobulins) and  
877 supplementary references.

878

879 **S1 Fig: Theoretical (A) and experimental (B) CD spectra of the (NANP)<sub>6</sub> peptide.**

880 The computational prediction of the spectra (A) was performed using DichroCalc  
881 [57], the experimental spectra was measured at 222 nm at 25 °C. A peak at 185 nm,  
882 minimum at 205 nm and shoulder between 215 and 240 nm are consistent with an  
883 intrinsically disordered, but not random coil, structure.

884

885 **S2 Fig: Cluster analysis for MD simulations of (NANP)<sub>6</sub> peptide.** Conformations

886 were clustered by concatenating the trajectory and performing a Jarvis-Patrick  
887 analysis. The clusters are sorted by their RMSD from the first cluster (starting  
888 geometry). As shown, Run 2 is stable in the starting geometry for several ns, while  
889 Run 3 diverged, then reconverged to the starting geometry, where it was stable for  
890 several ns. These data suggest the quasi-helical structure observed from the ab initio  
891 calculations is stable, and can be spontaneously sampled, on a timescale of several ns.

892

893 **S3 Fig: Cluster analysis for MD simulations of (NANP)<sub>6</sub> peptide.** Molecular

894 dynamics simulation of the (NANP)<sub>6</sub>:F<sub>AB</sub> complex. Root mean square deviation  
895 (RMSD) of the (NANP)<sub>6</sub>:F<sub>AB</sub> complex as a function of time. Independent simulations

896 are shown in green, black and red.

897

898 **S4 Fig: The B cell response to CSP has a T-independent component.** Mice either  
899 treated with an anti-CD4 depleting antibody or an isotype control were immunized  
900 with either *P. berghei* CS<sup>Pf</sup> RAS, live *P. berghei* CS<sup>Pf</sup> under CQ cover or rCSP. (A) 4  
901 days later the IgM and IgG response to the (NANP)<sub>n</sub> repeat was analyzed by ELISA  
902 (B) At the same time the number of IgD<sup>-</sup> Tetramer<sup>+</sup> B cells was quantified in the  
903 spleen. Data are from a single experiment, analyzed using linear models with  
904 immunization/treatment as the experimental factor.

905

906 **S5 Fig: Alignment of 2A10 heavy chain and the predicted germline sequence**

907 Residues that are mutated away from the predicted germline sequence in more one or  
908 more other antibody heavy chain (2E7 or 3D6) are highlighted in red, mutations that  
909 are predicted to be involved in binding to CSP are highlighted in blue.

910

911 **S6 Fig: Alignment of 2A10 heavy chain and the predicted germline sequence**

912 Residues that are mutated away from the predicted germline sequence in both 2A10  
913 and the related 2E7 antibody are highlighted in red, mutations that are predicted to be  
914 involved in binding to CSP are highlighted in blue.

915

916 **Movie S1: Molecular Dynamics simulation of the solution structure of the**

917 **(NANP)<sub>6</sub> peptide**

918 Excerpt from (NANP)<sub>6</sub> run 3. The trajectory was fitted to minimize alpha-carbon  
919 RMSD and then passed through a low-pass filter with a filter length of 8 frames to  
920 reduce temporal aliasing.

921

922 **Movie S2: Molecular Dynamics simulation of the interaction of the (NANP)<sub>n</sub>**

923 **repeat with the 2A10 F<sub>AB</sub>**

924 Excerpt from 2A10:(NANP)<sub>6</sub> run 3. The trajectory was fitted to minimize alpha-

925 carbon RMSD and then passed through a low-pass filter with a filter length 8 frames

926 to reduce temporal aliasing.

927 **Figure Legends**

928

929 **Fig. 1. ITC data for interactions between 2A10 F<sub>AB</sub> and antigens.** (A) Titration of

930 2A10 F<sub>AB</sub> with (NANP)<sub>6</sub>. (B) Titration of 2A10 F<sub>AB</sub> with rCSP. (C) Titration of 2A10

931 (complete antibody) with rCSP. The upper panels represent baseline-corrected power

932 traces. By convention, negative power corresponds to exothermic binding. The lower

933 panels represent the integrated heat data fitted to the independent binding sites model.

934

935 **Fig 2. Structures of the (NANP)<sub>6</sub> peptide (A), the 2A10 F<sub>AB</sub> fragment (B) and the**

936 **model of the F<sub>AB</sub> fragment-(NANP)<sub>6</sub> complex (C).** (A) The calculated structure of

937 the (NANP)<sub>6</sub> peptide is a helical structure containing the same hydrogen bonds

938 between a carbonyl following the proline and the amide nitrogen of the alanine, and

939 the carbonyl group of an asparagine and a backbone amide of asparagine 3 residues

940 earlier (highlighted in red) that are observed in [29]. (B) Electron density (blue mesh;

941 2mF<sub>o</sub>-dF<sub>c</sub> at 1 σ) of the 2A10 F<sub>AB</sub> fragment viewed from above the antigen-binding

942 site. Light chain is shown as yellow sticks, heavy chain as cyan. (C) A calculated

943 model of the (NANP)<sub>6</sub>:2A10 F<sub>AB</sub> fragment complex. The CDR2 regions of each chain

944 are shown in red, the CDR3 regions of each chain are shown in blue.

945

946 **Fig 3. Detailed view of the (NANP)<sub>6</sub>:2A10 F<sub>AB</sub> interface and site directed**

947 **mutagenesis.** (A) A model of the light chain:(NANP)<sub>6</sub> interface. (B) ELISA results  
948 showing the effect of mutating light chain interface residues; error bars are based on  
949 technical replicates from one of two independent experiments. (C) A model of the  
950 heavy chain:(NANP)<sub>6</sub> interface. (D) ELISA results showing the effect of mutating  
951 heavy chain interface residues; error bars are based on technical replicates from one  
952 of two independent experiments.

953 **Fig 4. The multivalency of the NANP repeat region of the CSP protein.** (A) An

954 (NANP)<sub>6</sub> peptide results in the presentation of two symmetrical epitopes, formed by  
955 alternating repeats (cyan and magenta), allowing binding by two F<sub>AB</sub> domains, in  
956 keeping with the stoichiometry observed by ITC. (B) The full 27-mer repeat region  
957 results in the presentation of at least 10 separate epitopes and the twist of the helix  
958 results in displacement along the length of the repeat region, which allows binding of  
959 up to 10 separate F<sub>AB</sub> fragments, consistent with 4 antibodies bound by both F<sub>AB</sub>  
960 domains, and two bound by a single F<sub>AB</sub> domain.

961

962 **Fig 5. CSP-specific B cells enter the germinal center following sporozoite**

963 **immunization.** BALB/C mice were immunized with either  $5 \times 10^4$  *P. berghei* CS<sup>5M</sup>  
964 (expressing the endogenous *P. berghei* CSP repeat) or  $5 \times 10^4$  *P. berghei* CS<sup>Pf</sup>  
965 (expressing the circumsporozoite protein from *P. falciparum*) live spoorzoites under  
966 CQ cover. 12 days later the B cell response was analyzed by flow cytometry and  
967 putative (NANP)<sub>n</sub>-specific cells were identified using PE and APC conjugated  
968 tetramers. (A) Representative flow cytometry plots showing the identification of



969 (NANP)<sub>n</sub>-specific (Tetramer<sup>+</sup>) cells. (B) Representative flow cytometry plots showing  
970 the proportion of Tetramer<sup>+</sup> cells that have class switched and entered a GC. (C)  
971 Quantification of the number of class switched Tetramer<sup>+</sup> cells under different  
972 immunization conditions. (D) Quantification of the number of GC Tetramer<sup>+</sup> cells  
973 under different immunization conditions. Data from a single representative  
974 experiment of 2 repeats, analyzed by one-way ANOVA with Tukey's post test.

975

976 **Fig 6. The B cell response to CSP has a T-independent component.** CD28<sup>-/-</sup> and  
977 control C57BL/6 mice were immunized with *P. berghei* CS<sup>Pf</sup> radiation attenuated  
978 sporozoites (RAS) or rCSP in alum. Sera were taken and the spleens analyzed for  
979 antigen specific B cells using tetramers 4, 7 and 27 days post-immunization. (A) IgM  
980 and IgG (NANP)<sub>n</sub> ELISA responses following RAS immunization (B) Representative  
981 flow cytometry plots 7 days post RAS immunization showing the gating of different  
982 B cell populations among Tetramer<sup>+</sup> cells. (C) Absolute numbers of (i) total Tetramer<sup>+</sup>  
983 IgD<sup>-ve</sup> (ii) Tetramer<sup>+</sup> Plasmablasts and (iii) Tetramer<sup>+</sup> GC B cells post RAS  
984 immunization. (D) Antibody responses and (E) absolute numbers of Tetramer<sup>+</sup> IgD<sup>-</sup> B  
985 cells 4 days post immunization with rCSP. Log-transformed data pooled from 2  
986 independent experiments for each immunization (>3 mice/group/timepoint) were  
987 analyzed using linear mixed models with day and genotype/immunization as  
988 experimental factors and the individual experiment as a random factor; only  
989 significant differences are shown.

990

991 **Fig 7. Limited diversity of (NANP)<sub>n</sub> specific antibodies.** BCR sequences were  
992 amplified from Tetramer<sup>+</sup> cells sorted from BALB/C mice 35 days after immunization  
993 with live *P. berghei* CS<sup>Pf</sup> sporozoites under CQ cover as well as bulk (B220<sup>+</sup>) B cells

994 from naïve BALB/C mice (A) IGHV gene usage from among B cells from a  
995 representative naïve mouse (grey bars) and Tetramer+ cells from immune mice (red,  
996 blue and yellow bars). (B) Shannon's diversity calculated for the diversity of IGHV  
997 region usage among bulk B cells and Tetramer<sup>+</sup> cells. (C) Circos plots showing the  
998 IGHV-IGHJ pairings in a representative naïve mice and 3 immune mice. (D) IGKV  
999 gene usage from among B cells from a representative naïve mouse (grey bars) and  
1000 Tetramer+ cells from immune mice (red, blue and green bars). (E) Shannon's diversity  
1001 calculated for the diversity of IGKV region usage among bulk B cells and Tetramer<sup>+</sup>  
1002 cells. (F) Circos plots showing the IGKV-IGKJ pairings in a representative naïve  
1003 mouse and 3 immune mice. Statistical analysis of Shannon's diversity index was by  
1004 Student's T test.

1005

1006 **Fig 8. CSP-binding antibodies undergo somatic hypermutation and affinity**

1007 **maturation** (A) Violin plots showing the number of mutations per kappa chain read  
1008 from bulk B cells from 3 individual naïve mice and sorted (NANP)<sub>n</sub> specific B cells  
1009 from sporozoite immunized mice (B) Skyscraper plots showing the location of  
1010 mutations away from germline in the IGKV1-110 gene in a naïve mouse and in sorted  
1011 (NANP)<sub>n</sub> specific cells in three sporozoite immunized mice. (C) ELISA binding to the  
1012 (NANP)<sub>9</sub> peptide of recombinant antibodies corresponding to the 2A10 mAb, the  
1013 predicted germline precursor, and hybrid antibodies containing the 2A10 heavy chain  
1014 (mHC) paired with the germline light chain (gLC) and the 2010 light chain (mLC)  
1015 paired with germline heavy chain (gHC). (D) Predicted mutations in the gLC were  
1016 introduced to the germline precursor and their effect on binding to (NANP)<sub>9</sub> measured  
1017 by ELISA (E) Predicted mutations in the gHC were introduced to hybrid antibodies

1018 consisting of the mLC and the gHC heavy chain and their effect on binding to

1019 (NANP)<sub>9</sub> measured by ELISA.

1020

1021

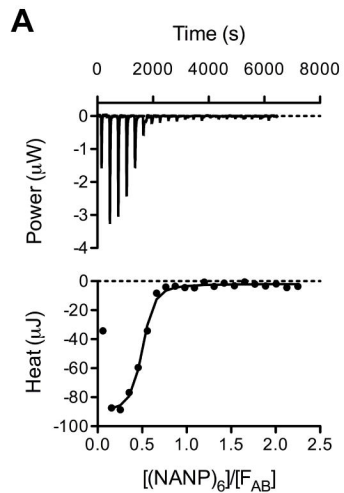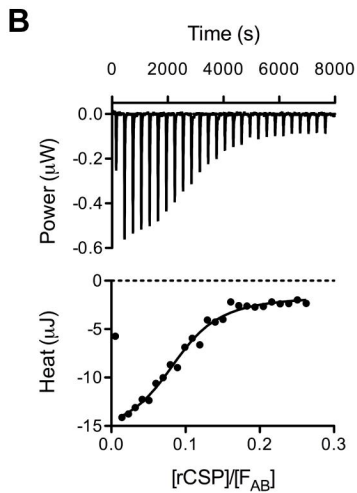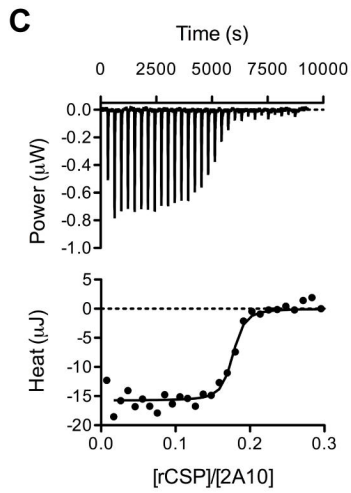

**A**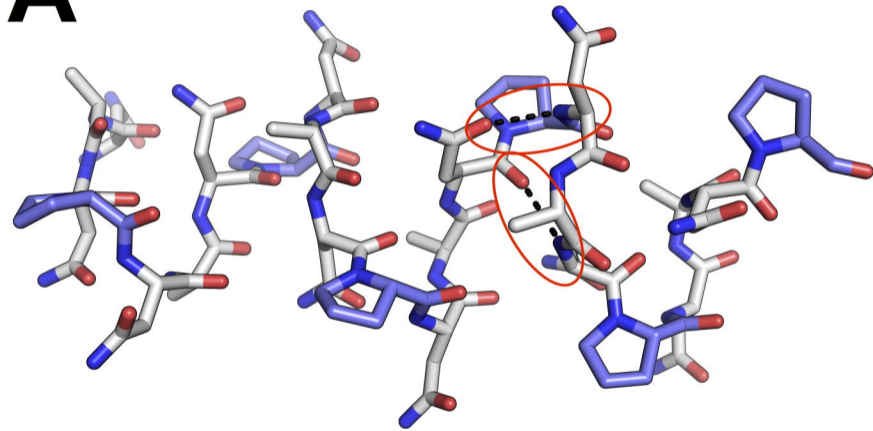**B**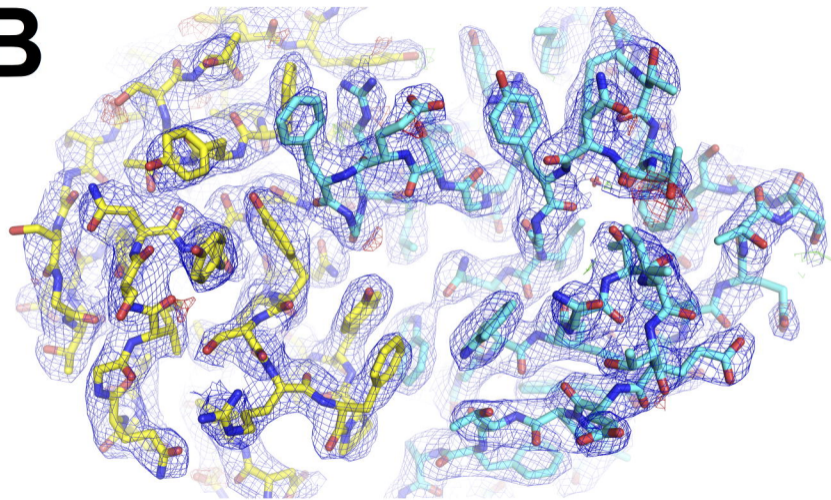**C**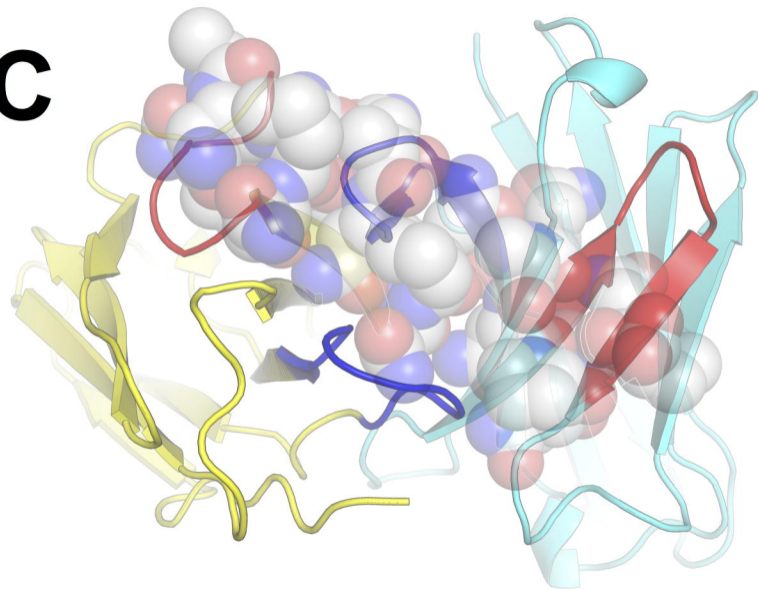

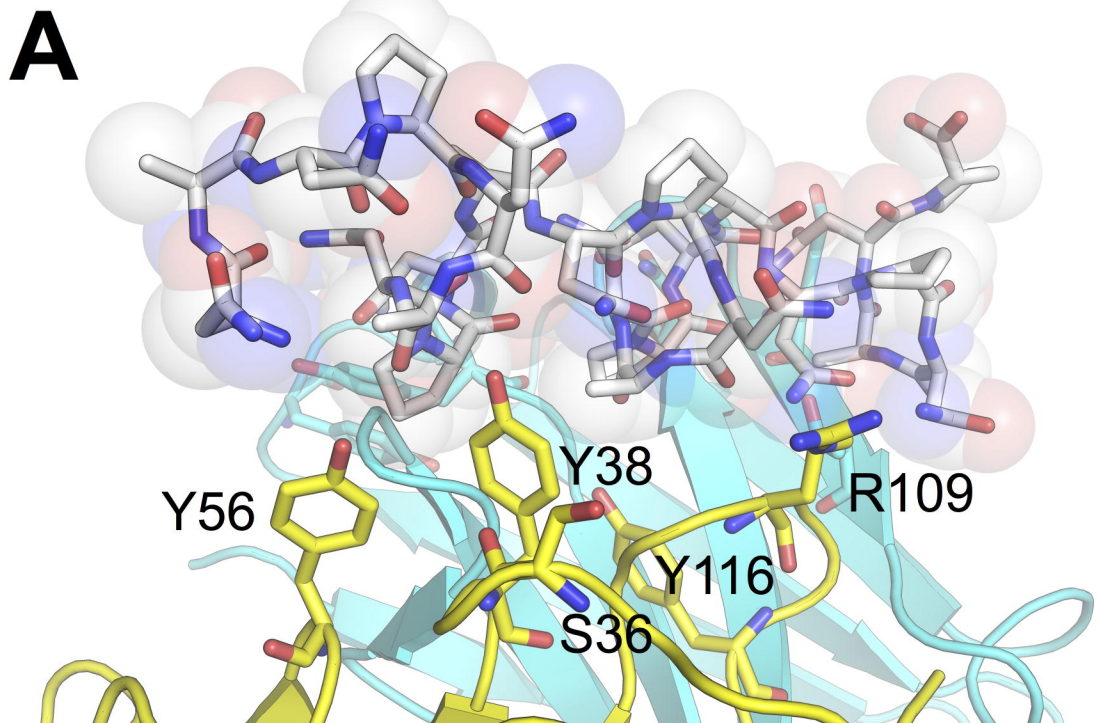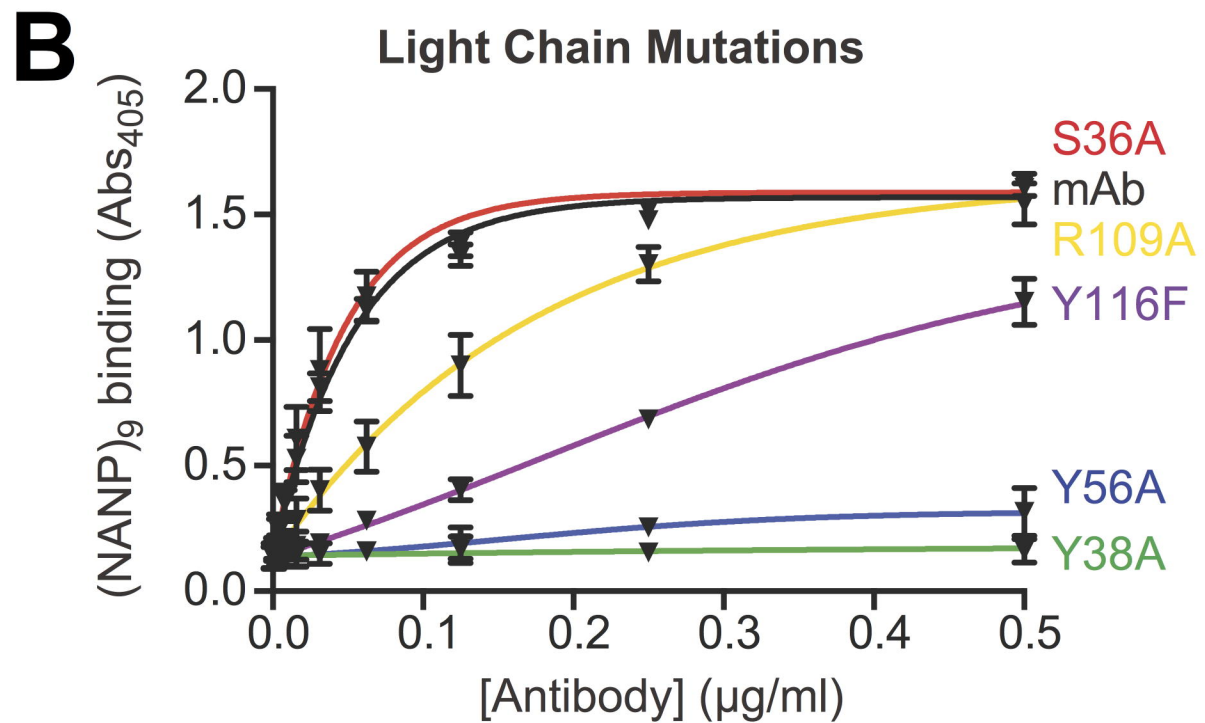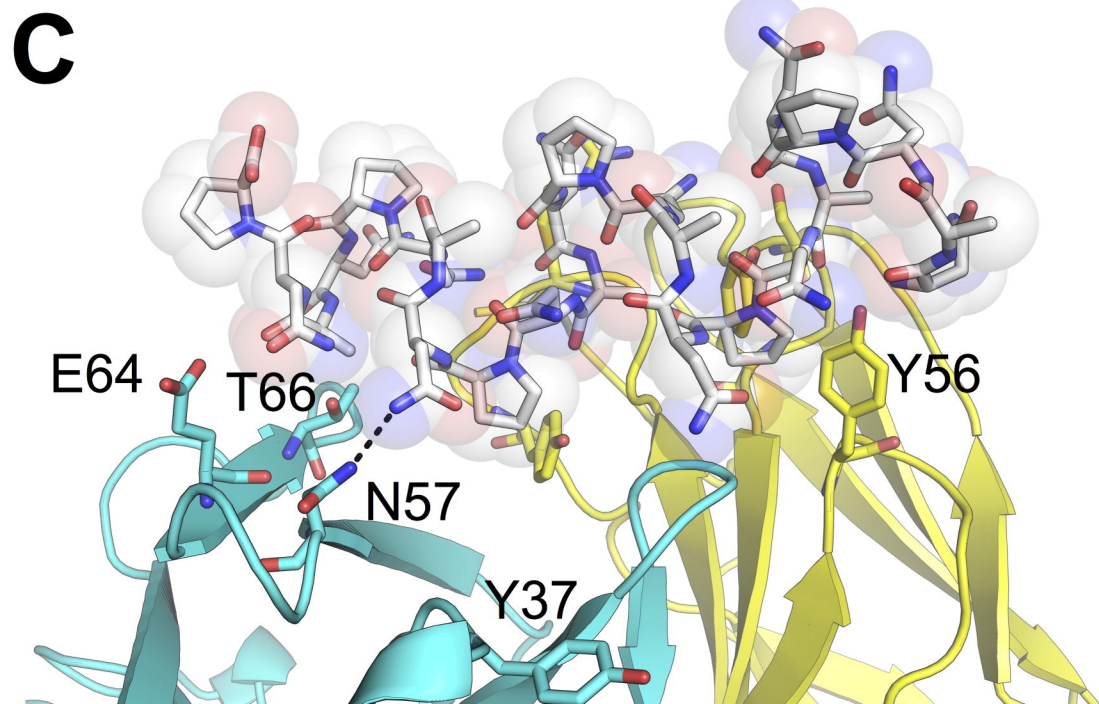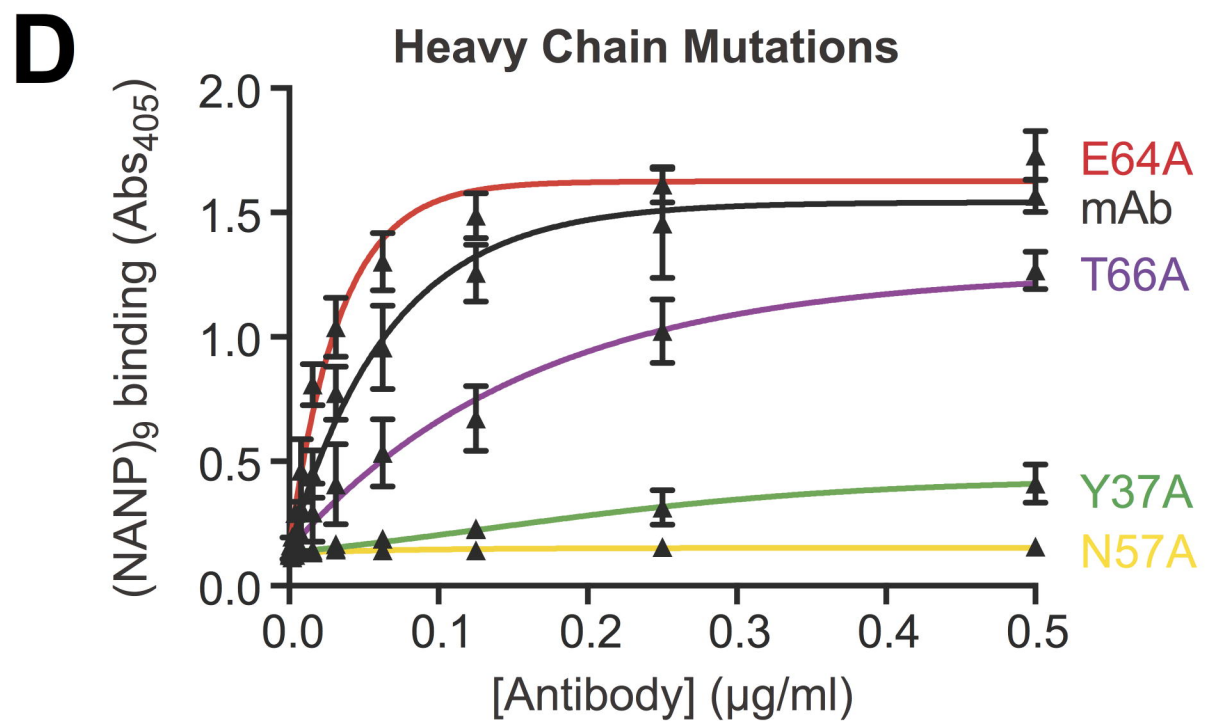

**A**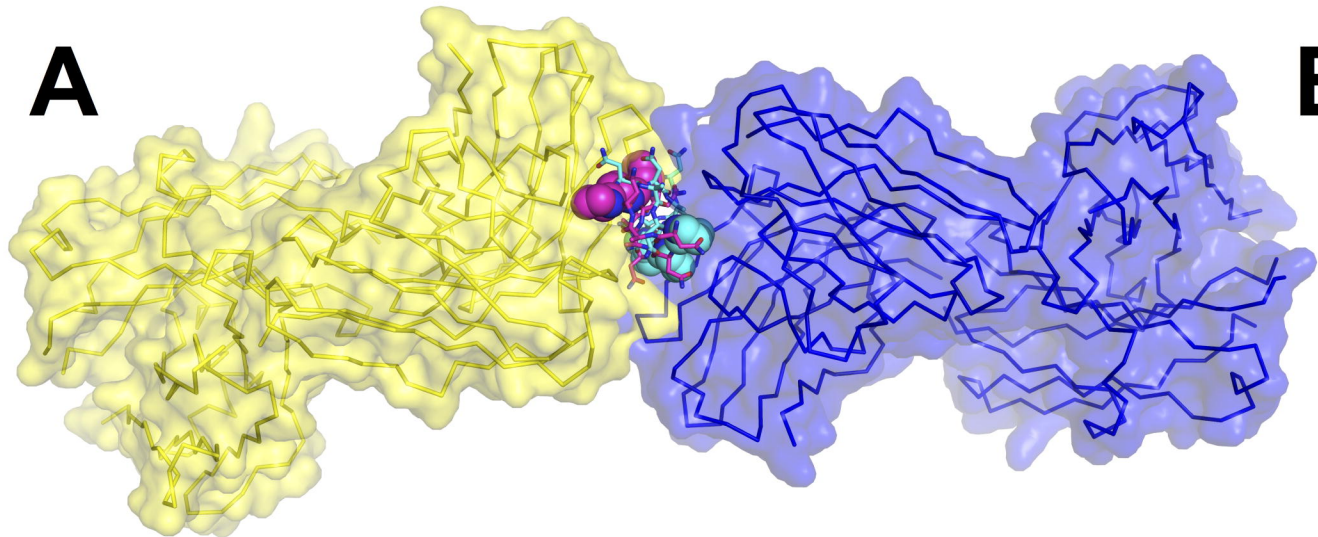**B**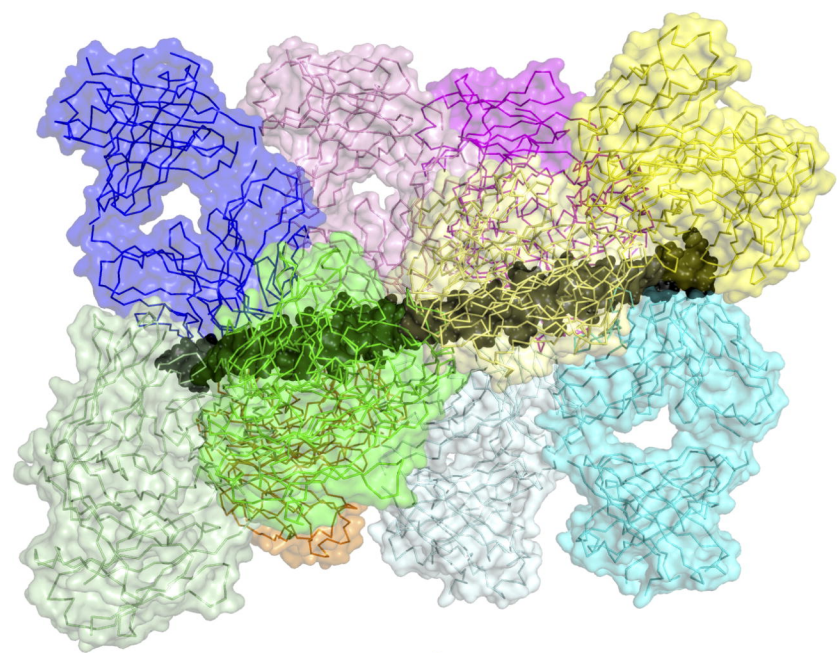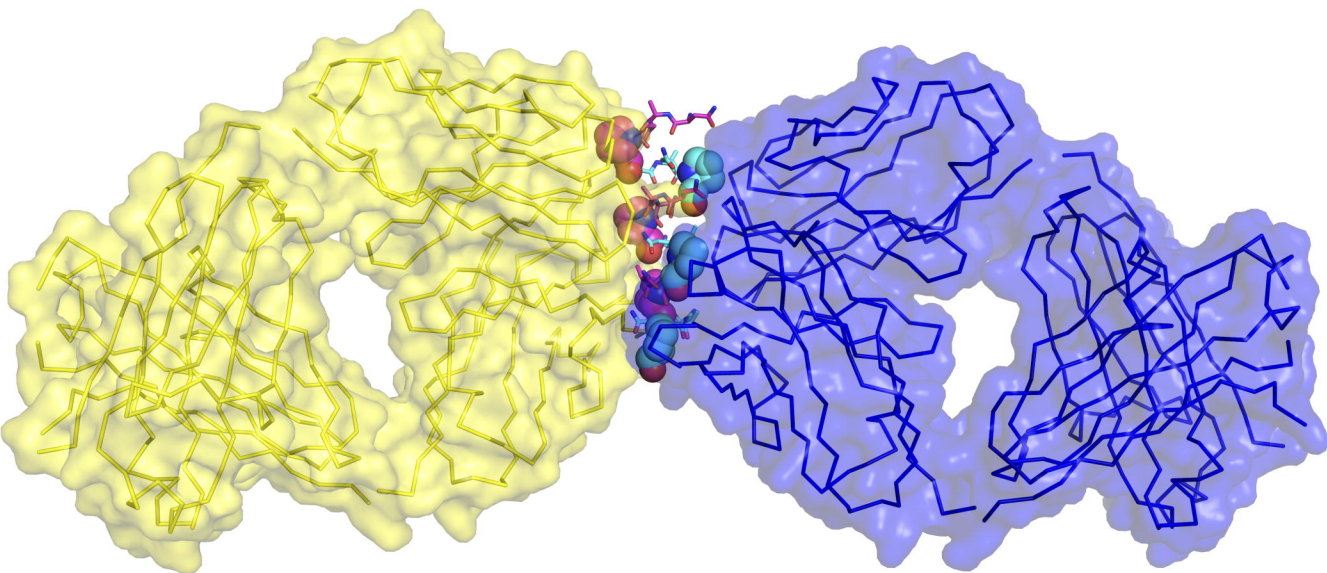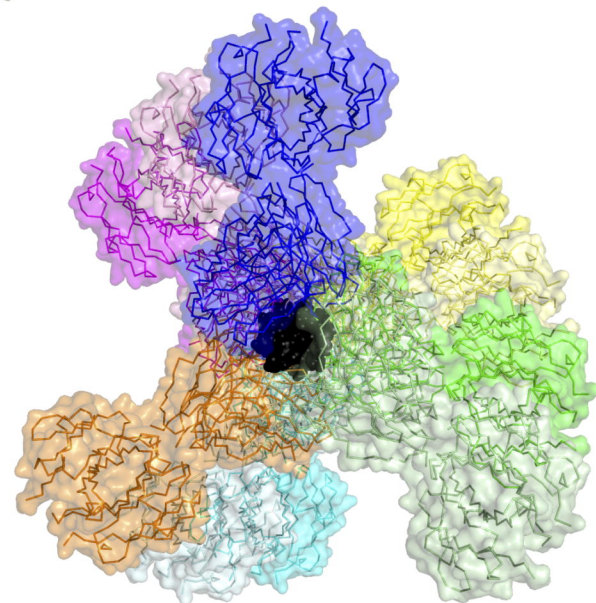

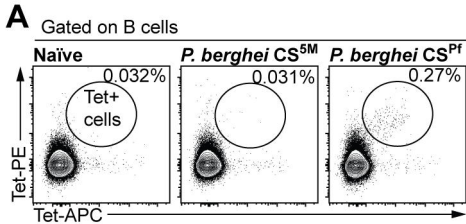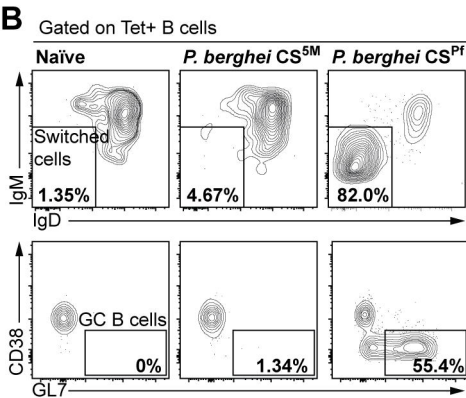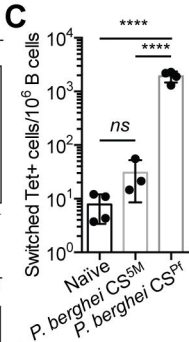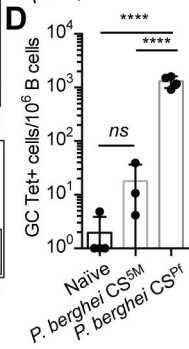



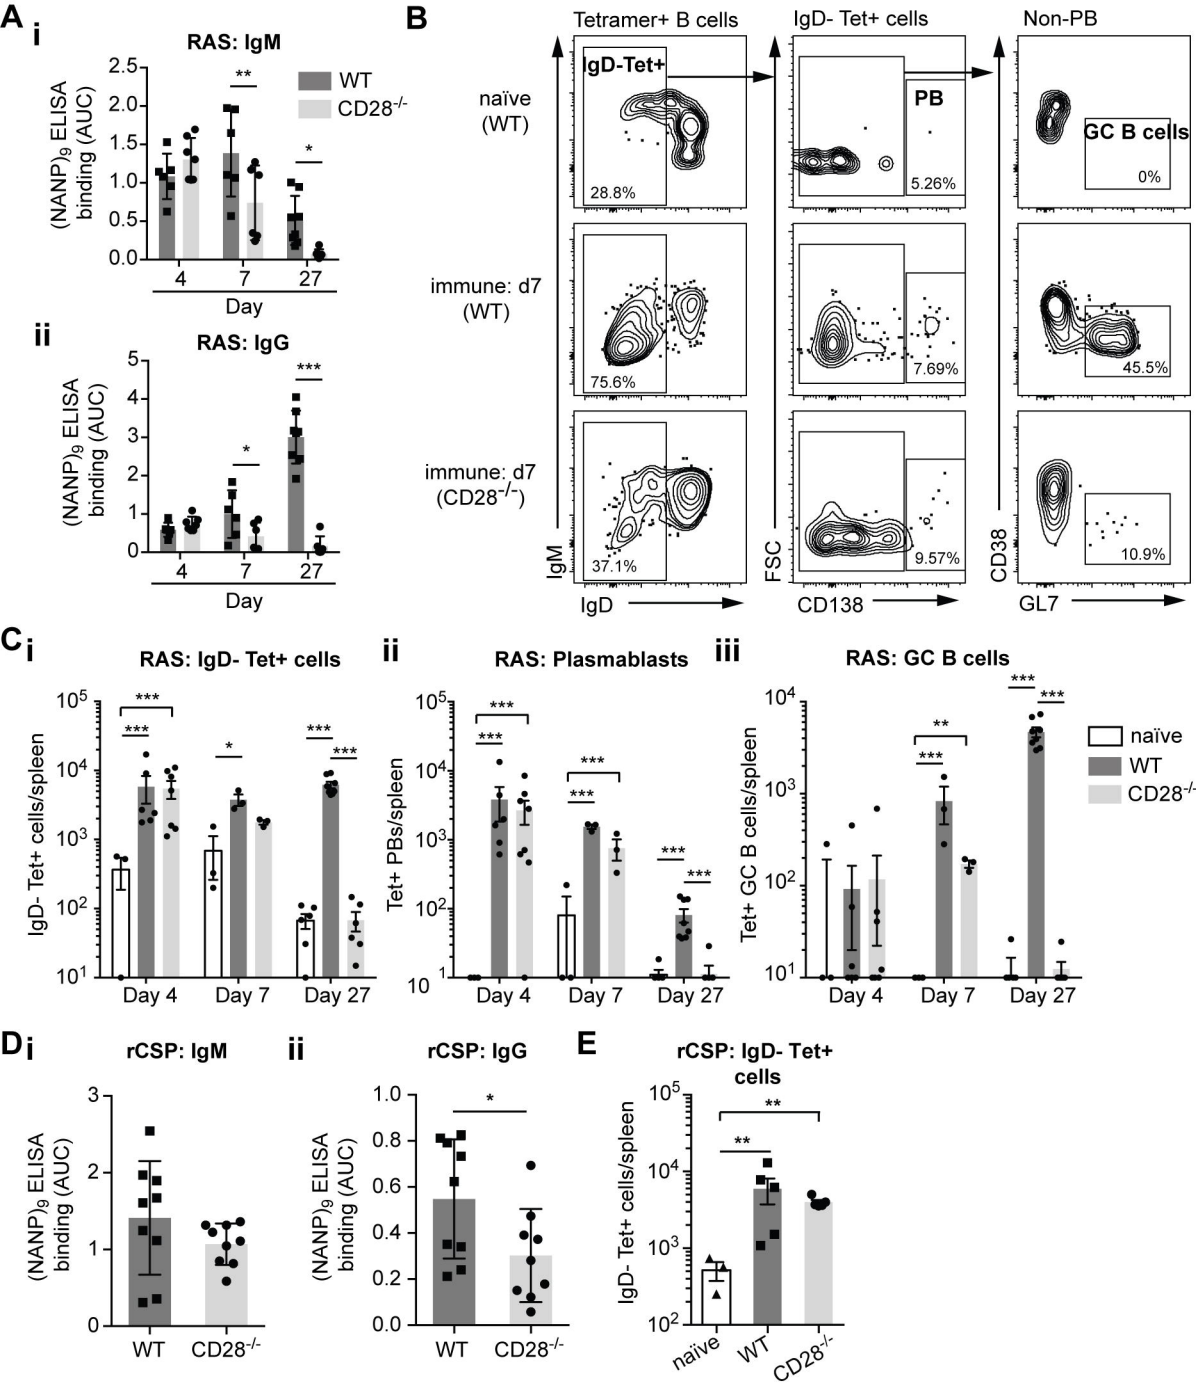

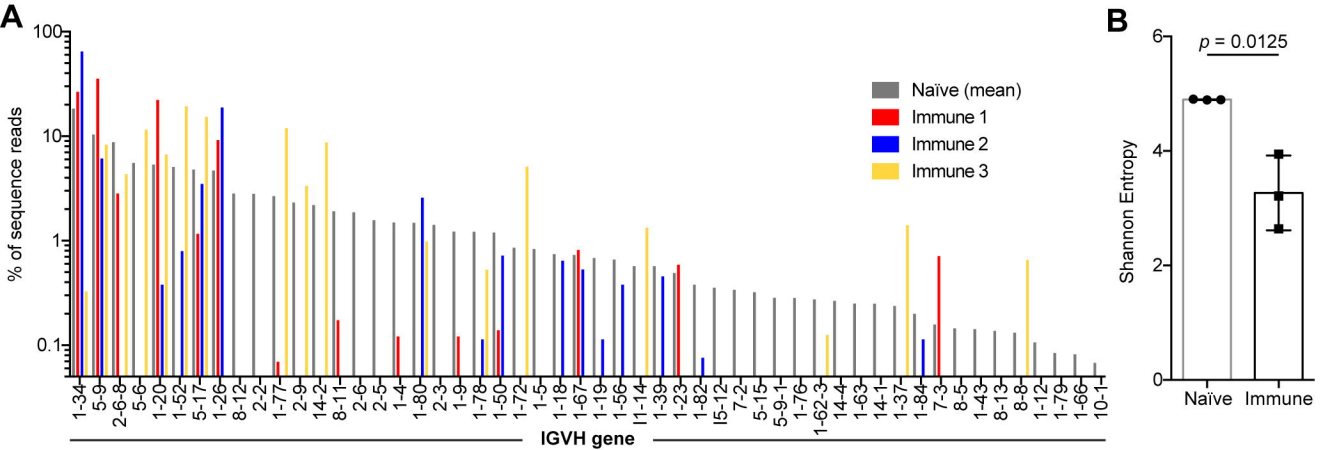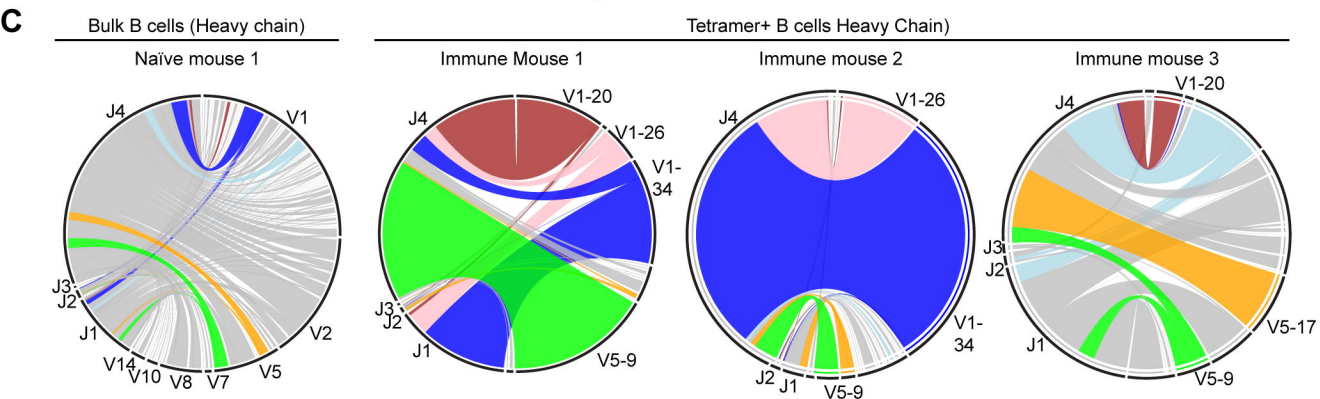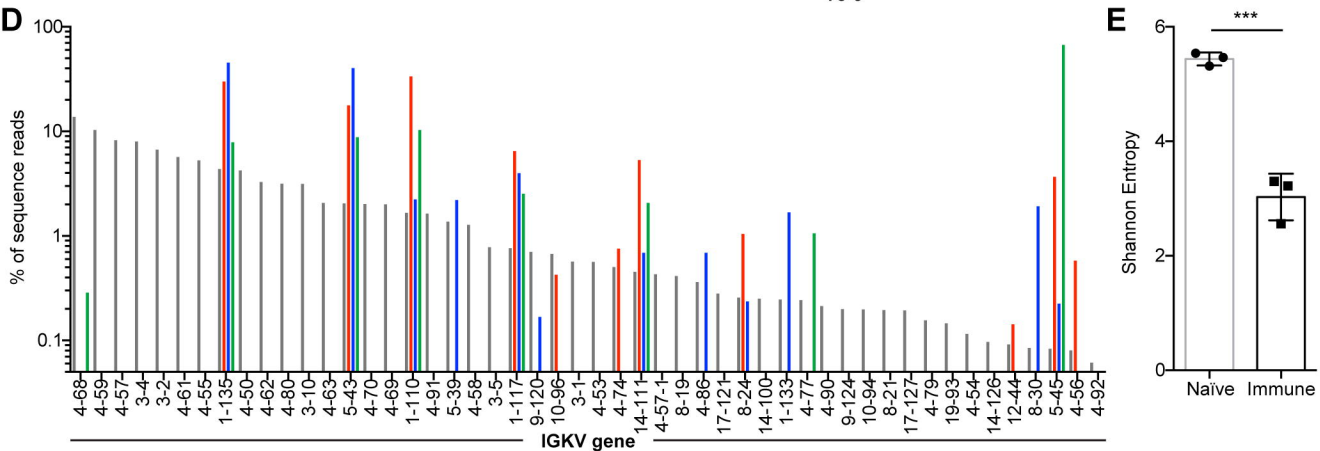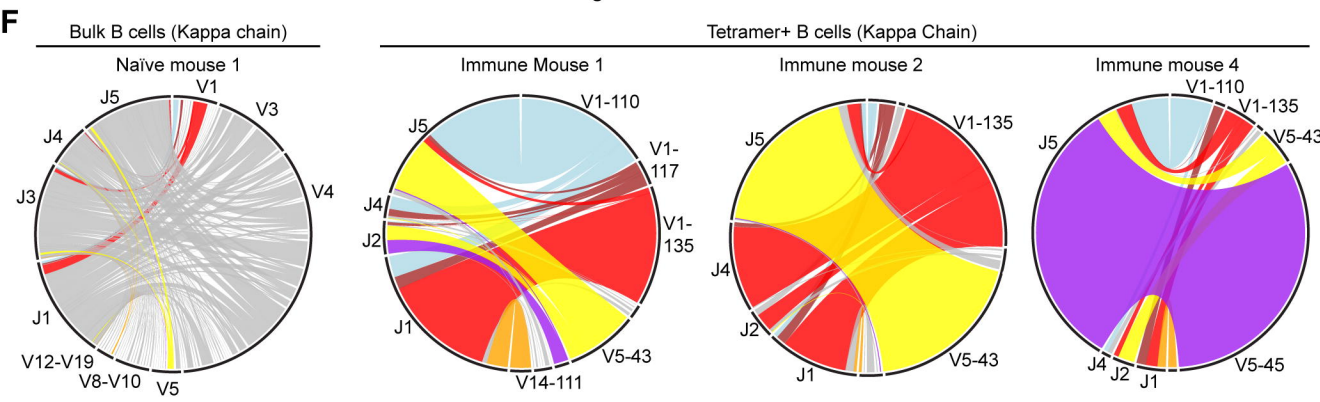

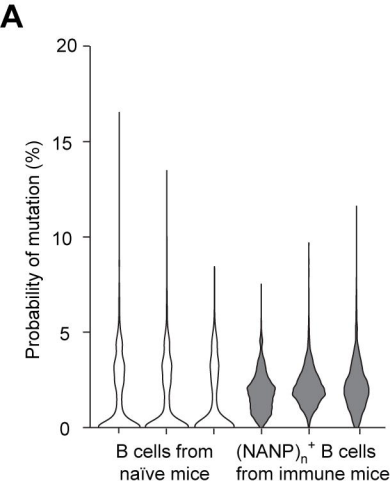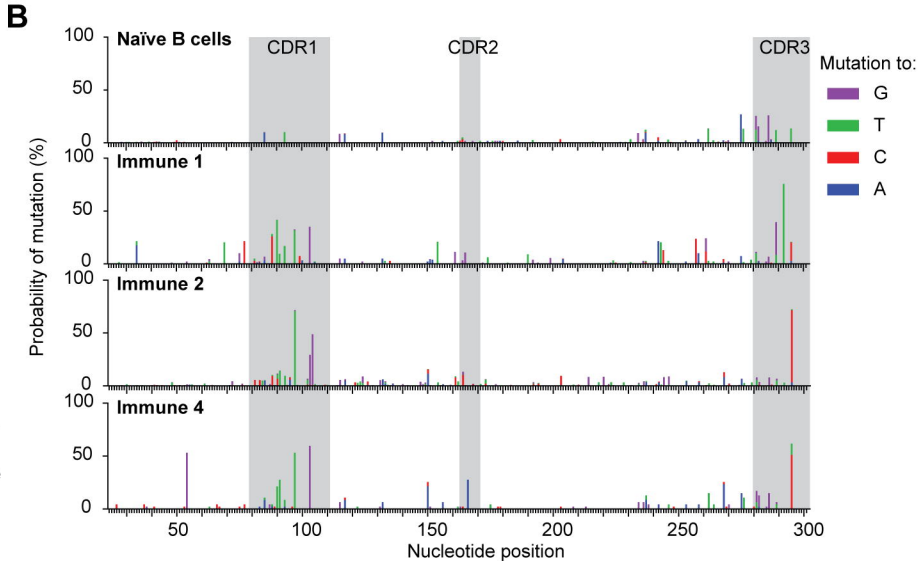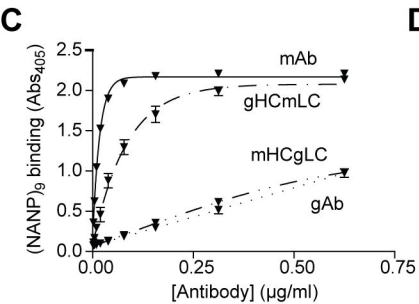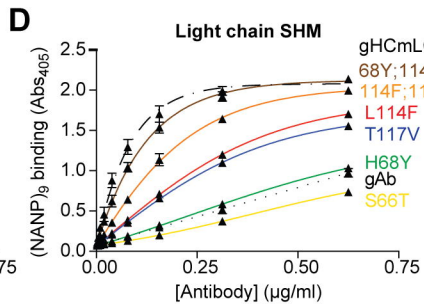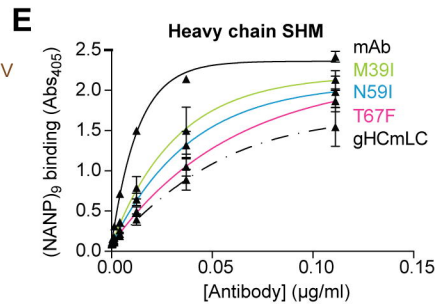

Source: http://biorxiv.org/content/10.1101/108746v3.full.pdf
